# Supplementary material for: Quinoline/thiazole compounds as selective acetylcholinesterase inhibitors: synthesis and biological assessment
Source: Royal Society of Chemistry journal article supplement (doi:10.1039/d6md00165c), 2026-04-07
Supplement: d6md00165c1.pdf [file d6md00165c1.pdf]

## **SUPPORTING INFORMATION**

### **Quinoline/Thiazole Compounds as Selective Acetylcholinesterase Inhibitors: Synthesis and Biological Assessment**

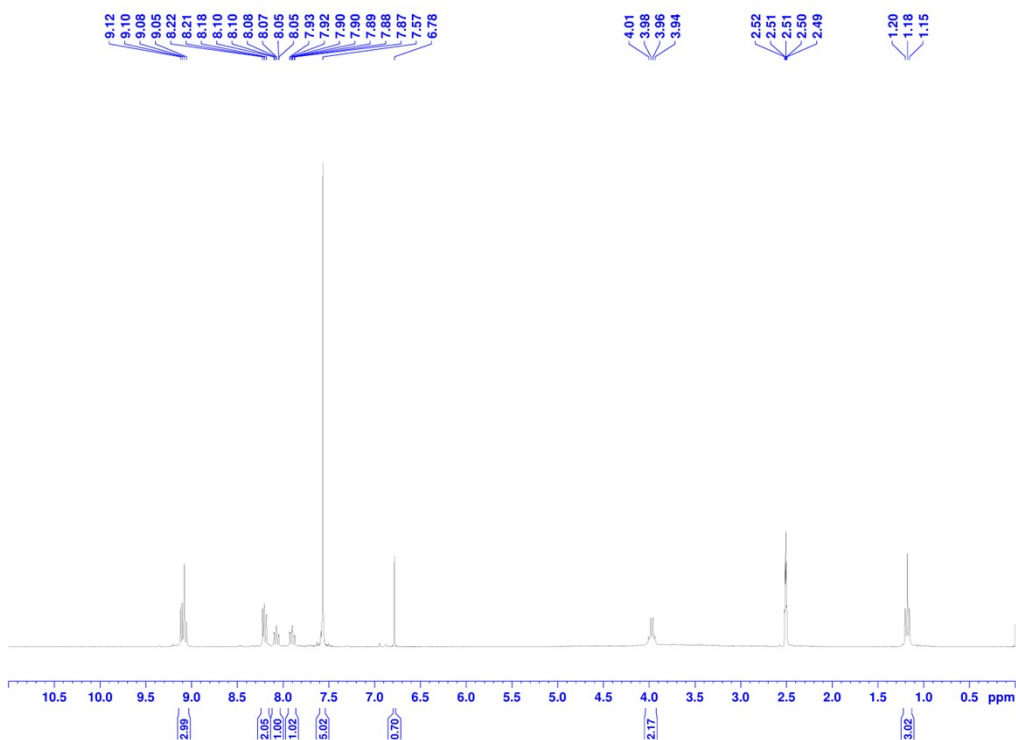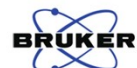

Current Data Parameters U  
 NAME  
 EXPNO 1  
 PROCNO 1  
 F2 - Acquisition Parameters  
 Date\_ 2025  
 Time 1  
 INSTRUM FOURIE  
 PROBHD 5 mm DUL 13C-1H/  
 PULPROG  
 TD 1  
 SOLVENT  
 NS  
 DS  
 SWH 6103  
 FIDRES 0.37  
 AQ 1.342  
 RG 40.  
 DW 81  
 DE  
 TE 2  
 D1 3.0000  
 TDO  
 ===== CHANNEL f1 =====  
 SFO1 300.181  
 NUC1  
 P1 1  
 PLW1 10.0000  
 F2 - Processing parameters  
 S1 5  
 SF 300.179  
 WDW  
 SSB  
 LB  
 GB  
 PC

Spectra 1. <sup>1</sup>H-NMR spectra of compound 3a

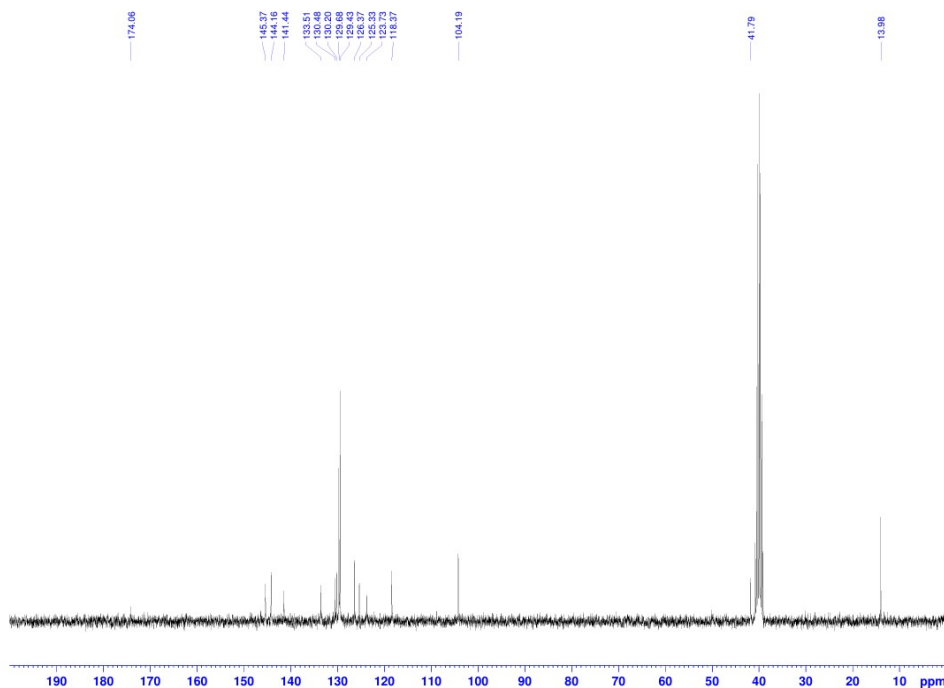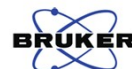

Current Data Parameters  
 NAME UMB-1  
 EXPNO 11  
 PROCNO 1  
 F2 - Acquisition Parameters  
 Date\_ 20250106  
 Time 11.25  
 INSTRUM FOURIER300  
 PROBHD 5 mm DUL 13C-1  
 PULPROG zgpg30  
 TD 32768  
 SOLVENT DMSO  
 NS 2048  
 DS 4  
 SWH 24414.062 Hz  
 FIDRES 0.745058 Hz  
 AQ 0.6710886 sec  
 RG 501.187  
 DW 20.480 usec  
 DE 6.50 usec  
 TE 294.2 K  
 D1 1.00000000 sec  
 D11 0.00000000 sec  
 D31 0.00001500 sec  
 D32 0.89999998 sec  
 D40 0.00093990 sec  
 L4 23  
 L5 26  
 P32 90.00 usec  
 TDO 1  
 ===== CHANNEL f1 =====  
 SFO1 75.4878687 MHz  
 NUC1 13C  
 P1 15.00 usec  
 PLW1 15.00000000 W  
 ===== CHANNEL f2 =====  
 SFO2 300.1812007 MHz  
 NUC2 1H  
 CPDPRG2 waltz16  
 PCPD2 90.00 usec  
 PLW2 10.00000000 W  
 PLW12 0.20860000 W  
 PLW13 0.10430000 W  
 F2 - Processing parameters  
 S1 32768  
 SF 75.4803210 MHz  
 WDW EM  
 SSB 0  
 LB 1.00 Hz  
 GB 0  
 PC 1.40

Spectra 2. <sup>13</sup>C-NMR spectra of compound 3a

Data File: C:\LabSolutions\Data\Analiz\Derya\UMB-1\_31.lcd

| Elmt | Val. | Min | Max | Elmt | Val. | Min | Max | Elmt | Val. | Min | Max | Elmt | Val. | Min | Max | Use Adduct |
|------|------|-----|-----|------|------|-----|-----|------|------|-----|-----|------|------|-----|-----|------------|
| H    | 1    | 5   | 35  | O    | 2    | 0   | 0   | S    | 2    | 0   | 4   | Ru   | 2    | 0   | 0   | H          |
| C    | 4    | 9   | 35  | F    | 1    | 0   | 0   | Cl   | 1    | 0   | 0   | Pd   | 2    | 0   | 0   |            |
| N    | 3    | 0   | 4   | P    | 3    | 0   | 0   | Br   | 1    | 0   | 0   | I    | 3    | 0   | 0   |            |

Error Margin (ppm): 5  
 HC Ratio: unlimited  
 Max Isotopes: 3  
 MSn Iso RI (%): 10.00

DBE Range: 0.0 - 20.0  
 Apply N Rule: yes  
 Isotope RI (%): 1.00  
 MSn Logic Mode: AND

Electron Ions: both  
 Use MSn Info: yes  
 Isotope Res: 9000  
 Max Results: 50

Event#: 1 MS(E+) Ret. Time : 2.307 - 1.507 -> 2.110 Scan# : 347 - 227 -> 317

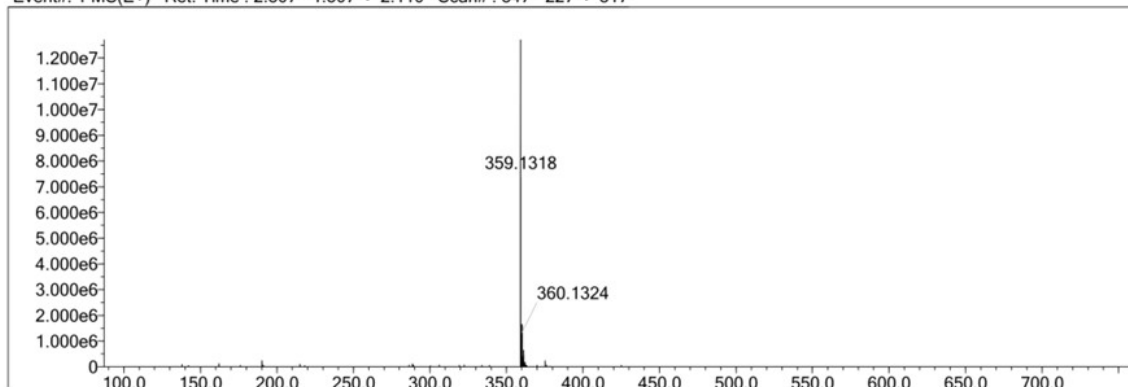

Measured region for 359.1318 m/z

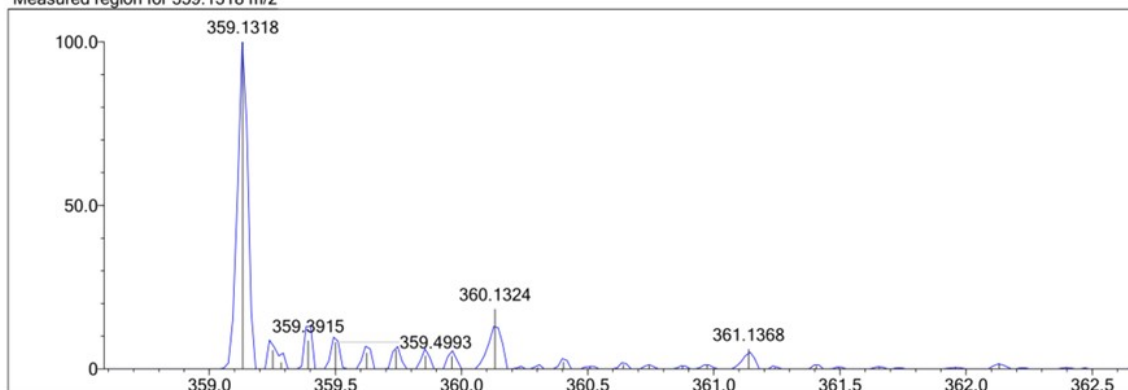

C21 H18 N4 S [M+H]<sup>+</sup> : Predicted region for 359.1325 m/z

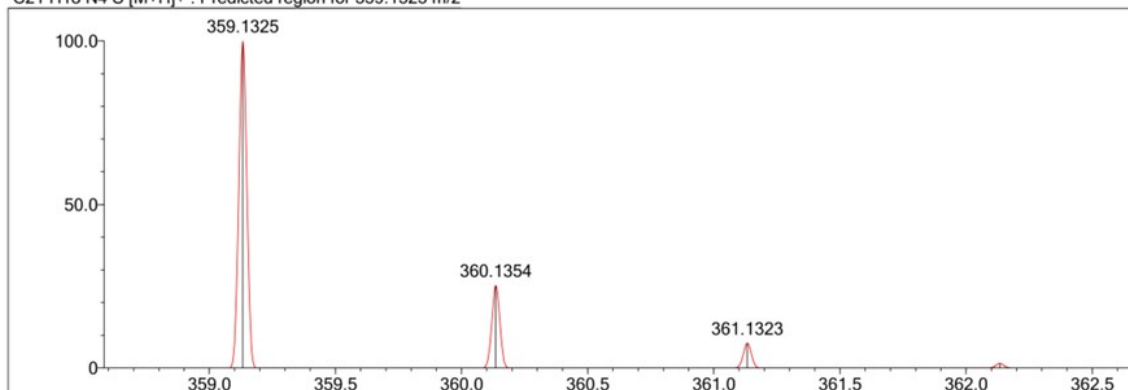

| Rank | Score | Formula (M)  | Ion                | Meas. m/z | Pred. m/z | Df. (mDa) | Df. (ppm) | Iso   | DBE  |
|------|-------|--------------|--------------------|-----------|-----------|-----------|-----------|-------|------|
| 1    | 61.17 | C21 H18 N4 S | [M+H] <sup>+</sup> | 359.1318  | 359.1325  | -0.7      | -1.95     | 62.65 | 15.0 |

**Spectra 3. HRMS spectra of compound 3a**

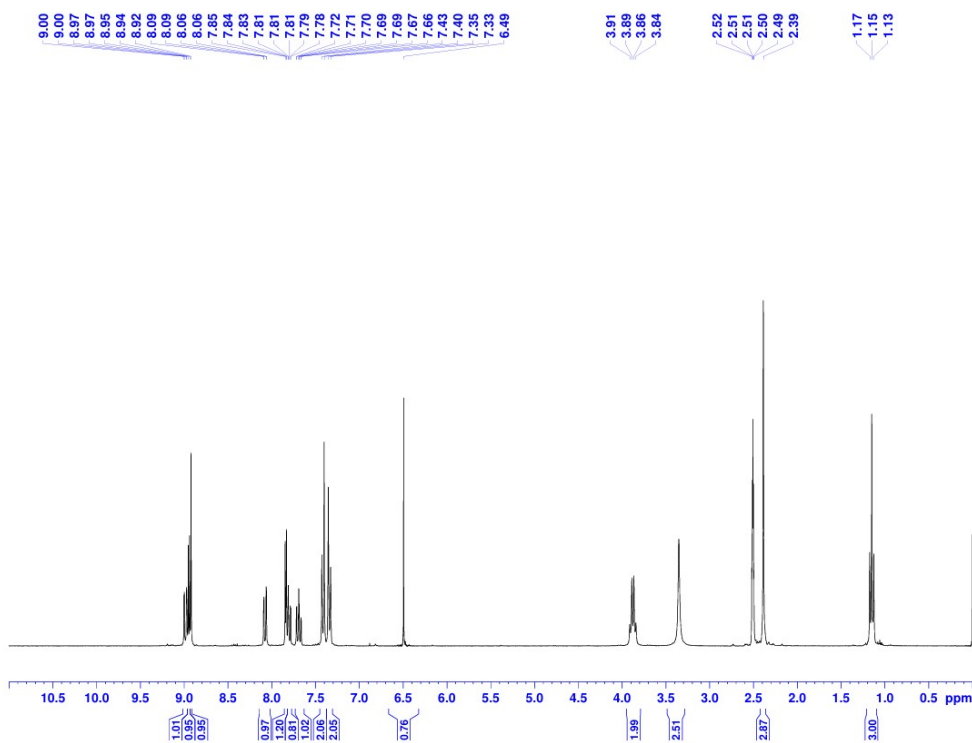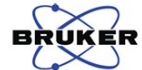

Current Data Parameters  
 NAME UMB-2  
 EXPNO 1  
 PROCNO 1

F2 - Acquisition Parameters  
 Date\_ 20241227  
 Time 13.04  
 INSTRUM FOURIER300  
 PROBHD 5 mm DUL 13C-1  
 PULPROG zg  
 TD 16384  
 SOLVENT DMSO  
 NS 16  
 DS 0  
 SWH 6103.516 Hz  
 FIDRES 0.372629 Hz  
 AQ 1.3421773 sec  
 RG 35707  
 DW 81.920 usec  
 DE 6.50 usec  
 TE 294.1 K  
 D1 3.0000000 sec  
 TD0 1

===== CHANNEL f1 =====  
 SFO1 300.1818537 MHz  
 NUC1 1H  
 P1 13.00 usec  
 PLW1 10.0000000 W  
 F2 - Processing parameters  
 SI 6556  
 SF 300.1799977 MHz  
 WDW EM  
 SSB 0  
 LB 0.30 Hz  
 GB 0  
 PC 1.00

Spectra 4. <sup>1</sup>H-NMR spectra of compound 3b

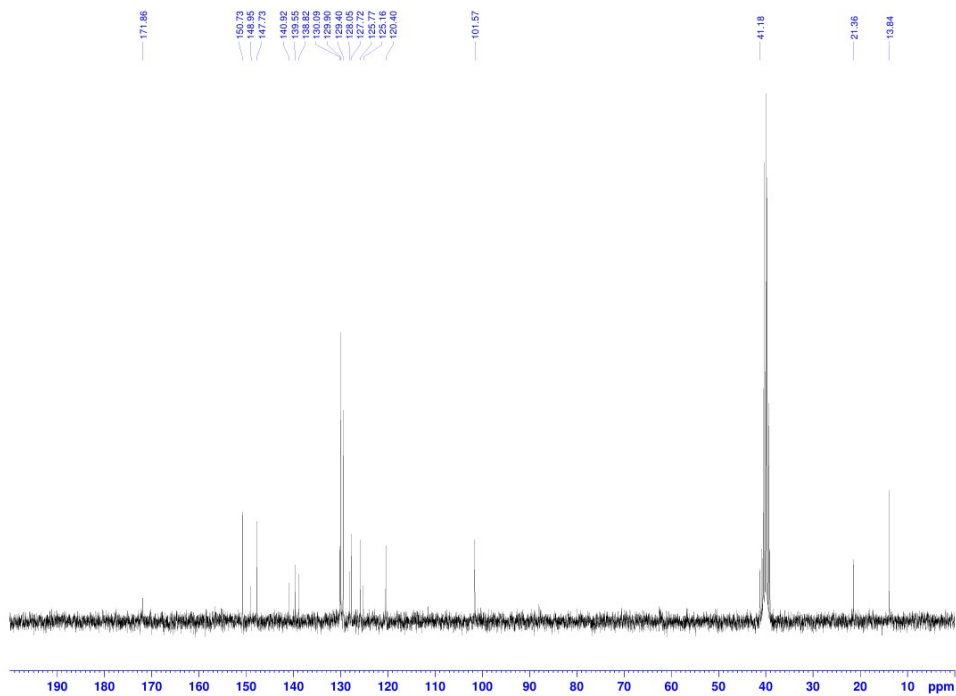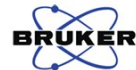

Current Data Parameters  
 NAME UMB-2  
 EXPNO 2  
 PROCNO 1

F2 - Acquisition Parameters  
 Date\_ 20241227  
 Time 13.06  
 INSTRUM FOURIER300  
 PROBHD 5 mm DUL 13C-1  
 PULPROG zgpg  
 TD 32768  
 SOLVENT DMSO  
 NS 870  
 DS 4  
 SWH 24414.062 Hz  
 FIDRES 0.745058 Hz  
 AQ 0.6710886 sec  
 RG 501.187  
 DW 20.480 usec  
 DE 6.50 usec  
 TE 294.2 K  
 D1 1.0000000 sec  
 D11 0.0300000 sec  
 D31 0.0000150 sec  
 D32 0.8999999 sec  
 D40 0.0009399 sec  
 L4 23  
 L5 26  
 P32 90.00 usec  
 TD0 1

===== CHANNEL f1 =====  
 SFO1 75.4878687 MHz  
 NUC1 13C  
 P1 15.00 usec  
 PLW1 15.0000000 W

===== CHANNEL f2 =====  
 SFO2 300.1812007 MHz  
 NUC2 1H  
 CPDPRG2 waltz16  
 PCPD2 90.00 usec  
 PLW2 10.0000000 W  
 PLW12 0.2086399 W  
 PLW13 0.1049500 W

F2 - Processing parameters  
 SI 32768  
 SF 75.4803210 MHz  
 WDW EM  
 SSB 0  
 LB 1.00 Hz  
 GB 0  
 PC 1.40

Spectra 5. <sup>13</sup>C-NMR spectra of compound 3b

Data File: C:\LabSolutions\Data\Analiz\Derya\UMB-2\_22.lcd

| Elmt | Val. | Min | Max | Elmt | Val. | Min | Max | Elmt | Val. | Min | Max | Elmt | Val. | Min | Max | Use Adduct |
|------|------|-----|-----|------|------|-----|-----|------|------|-----|-----|------|------|-----|-----|------------|
| H    | 1    | 5   | 35  | O    | 2    | 0   | 4   | S    | 2    | 0   | 2   | Ru   | 2    | 0   | 0   | H          |
| C    | 4    | 9   | 35  | F    | 1    | 0   | 0   | Cl   | 1    | 0   | 0   | Pd   | 2    | 0   | 0   |            |
| N    | 3    | 4   | 8   | P    | 3    | 0   | 0   | Br   | 1    | 0   | 0   | I    | 3    | 0   | 0   |            |

Error Margin (ppm): 5  
 HC Ratio: unlimited  
 Max Isotopes: 3  
 MSn Iso RI (%): 10.00

DBE Range: 8.0 - 30.0  
 Apply N Rule: yes  
 Isotope RI (%): 1.00  
 MSn Logic Mode: AND

Electron Ions: both  
 Use MSn Info: yes  
 Isotope Res: 9000  
 Max Results: 50

Event#: 1 MS(E+) Ret. Time : 5.493 Scan#: 825

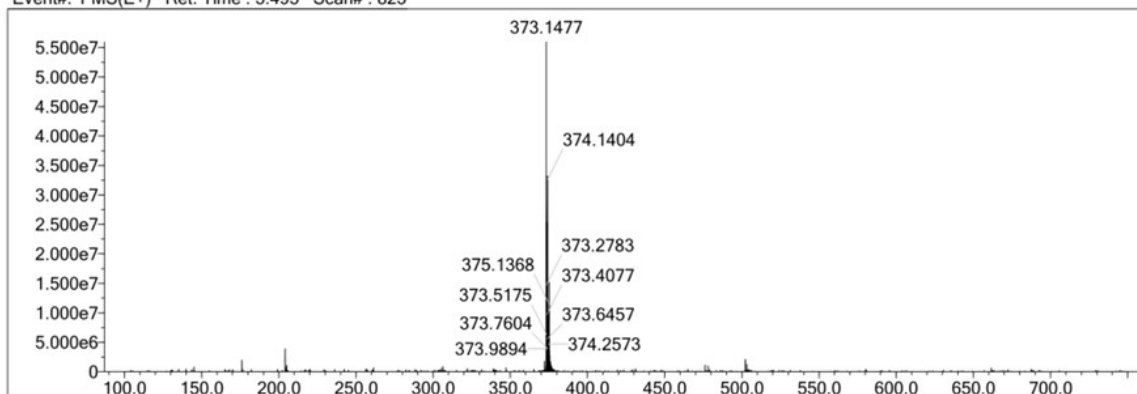

Measured region for 373.1477 m/z

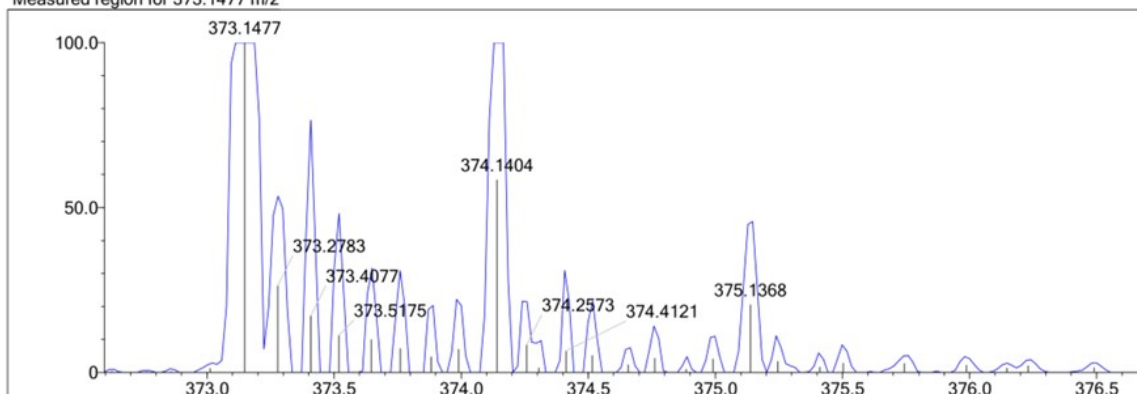

C22 H20 N4 S [M+H]+ : Predicted region for 373.1481 m/z

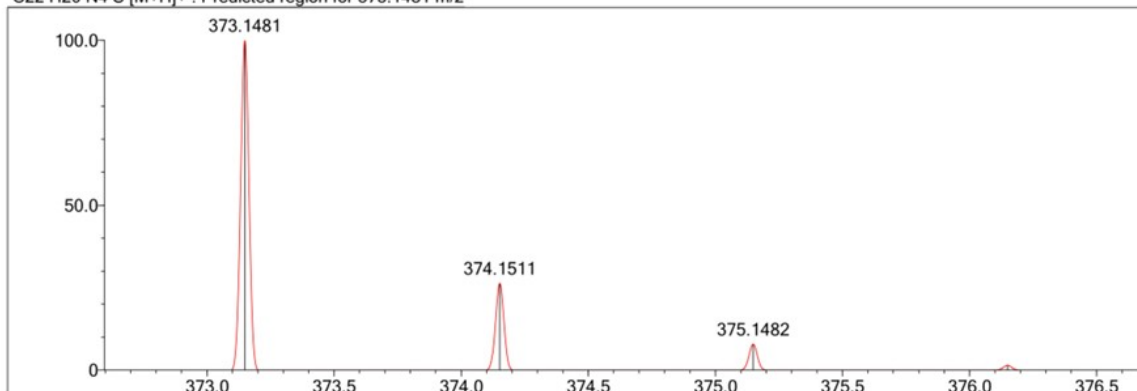

| Rank | Score | Formula (M)  | Ion    | Meas. m/z | Pred. m/z | Df. (mDa) | Df. (ppm) | Iso   | DBE  |
|------|-------|--------------|--------|-----------|-----------|-----------|-----------|-------|------|
| 1    | 26.28 | C22 H20 N4 S | [M+H]+ | 373.1477  | 373.1481  | -0.4      | -1.07     | 26.32 | 15.0 |

**Spectra 6. HRMS spectra of compound 3b**

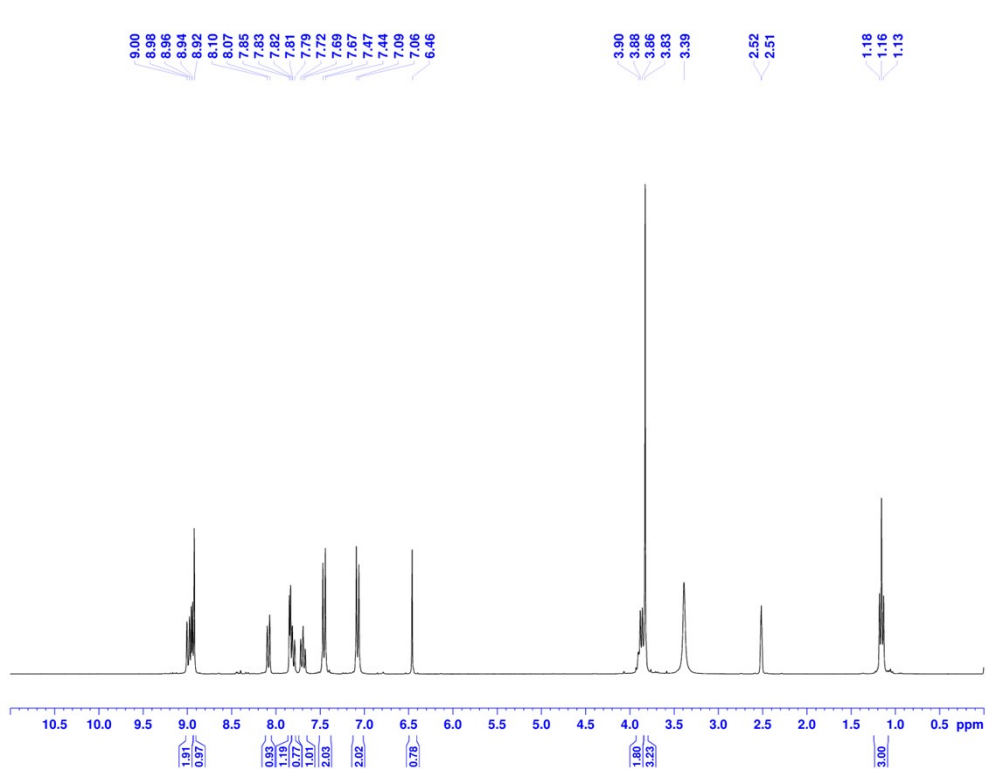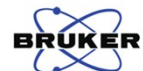

Current Data Parameters  
 NAME UMB-3  
 EXPNO 1  
 PROCNO 1

F2 - Acquisition Parameters  
 Date\_ 20250102  
 Time 11:14  
 INSTRUM FOURIER300  
 PROBHD 5 mm DUL 13C-1  
 PULPROG zg  
 TD 16384  
 SOLVENT DMSO  
 NS 16  
 DS 0  
 SWH 6103.516 Hz  
 FIDRES 0.372529 Hz  
 AQ 1.3421773 sec  
 RG 15.976  
 DW 81.520 usec  
 DE 6.50 usec  
 TE 293.8 K  
 D1 3.00000000 sec  
 TD0

===== CHANNEL f1 =====  
 SFO1 300.1818537 MHz  
 NUC1 1H  
 P1 13.00 usec  
 PLW1 10.00000000 W

F2 - Processing parameters  
 SI 65536  
 SF 300.1799849 MHz  
 WDW EM  
 SSB 0  
 LB 0.0 Hz  
 GB 0  
 PC 1.00

Spectra 7. <sup>1</sup>H-NMR spectra of compound 3c

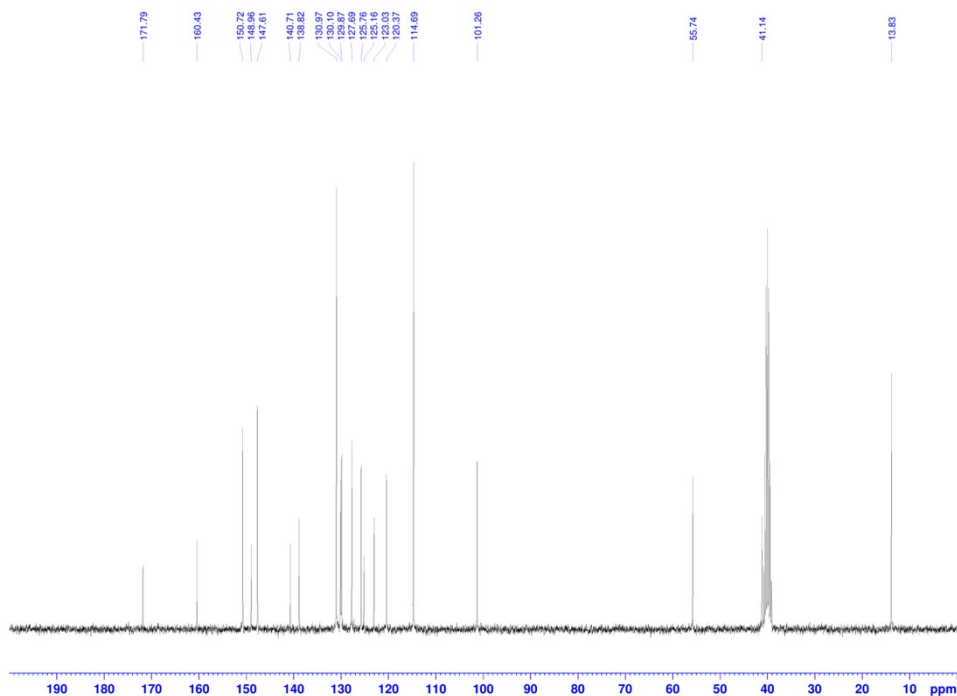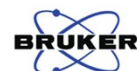

Current Data Parameters  
 NAME UMB-3  
 EXPNO 2  
 PROCNO 1

F2 - Acquisition Parameters  
 Date\_ 20250102  
 Time 11:15  
 INSTRUM FOURIER300  
 PROBHD 5 mm DUL 13C-1  
 PULPROG zgpg  
 TD 32768  
 SOLVENT DMSO  
 NS 2048  
 DS 4  
 SWH 24414.062 Hz  
 FIDRES 0.745058 Hz  
 AQ 0.6710886 sec  
 RG 501.187  
 DW 20.480 usec  
 DE 6.50 usec  
 TE 293.7 K  
 D1 1.00000000 sec  
 D11 0.03000000 sec  
 D31 0.00001500 sec  
 D32 0.89999998 sec  
 D40 0.00033990 sec  
 L4 23  
 L5 26  
 P32 90.00 usec  
 TD0 1

===== CHANNEL f1 =====  
 SFO1 75.4878687 MHz  
 NUC1 13C  
 P1 15.00 usec  
 PLW1 15.00000000 W

===== CHANNEL f2 =====  
 SFO2 300.1812007 MHz  
 NUC2 1H  
 CPDPRG2 waltz16  
 PCPD2 90.00 usec  
 PLW2 10.00000000 W  
 PLW12 0.20863990 W  
 PLW13 0.10495000 W

F2 - Processing parameters  
 SI 32768  
 SF 75.4803210 MHz  
 WDW EM  
 SSB 0  
 LB 1.00 Hz  
 GB 0  
 PC 1.40

Spectra 8. <sup>13</sup>C-NMR spectra of compound 3c

Data File: C:\LabSolutions\Data\Analiz\Derya\UMB-3\_23.lcd

| Elmt | Val. | Min | Max | Elmt | Val. | Min | Max | Elmt | Val. | Min | Max | Elmt | Val. | Min | Max | Use Adduct |
|------|------|-----|-----|------|------|-----|-----|------|------|-----|-----|------|------|-----|-----|------------|
| H    | 1    | 5   | 35  | O    | 2    | 0   | 4   | S    | 2    | 0   | 2   | Ru   | 2    | 0   | 0   | H          |
| C    | 4    | 9   | 35  | F    | 1    | 0   | 0   | Cl   | 1    | 0   | 0   | Pd   | 2    | 0   | 0   |            |
| N    | 3    | 4   | 8   | P    | 3    | 0   | 0   | Br   | 1    | 0   | 0   | I    | 3    | 0   | 0   |            |

Error Margin (ppm): 5  
 HC Ratio: unlimited  
 Max Isotopes: 3  
 MSn Iso RI (%): 10.00

DBE Range: 8.0 - 30.0  
 Apply N Rule: yes  
 Isotope RI (%): 1.00  
 MSn Logic Mode: AND

Electron Ions: both  
 Use MSn Info: yes  
 Isotope Res: 9000  
 Max Results: 50

Event#: 1 MS(E+) Ret. Time : 4.173 Scan#: 627

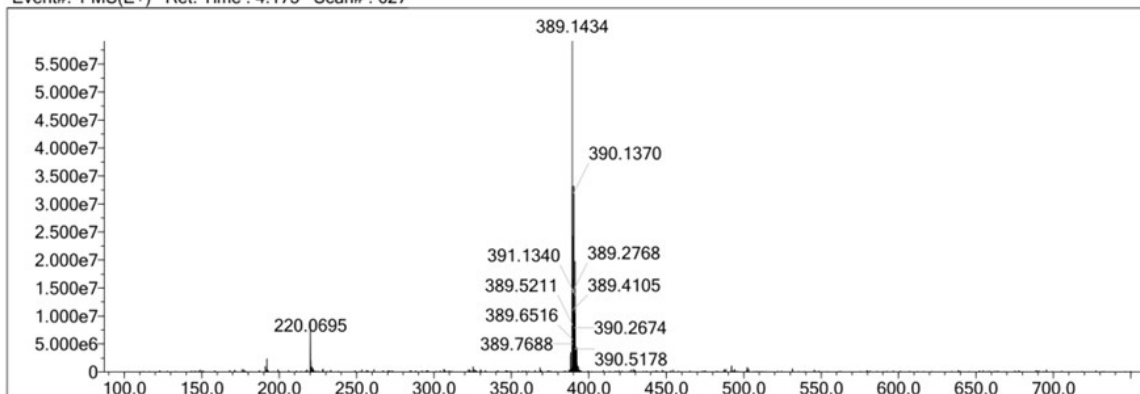

Measured region for 389.1434 m/z

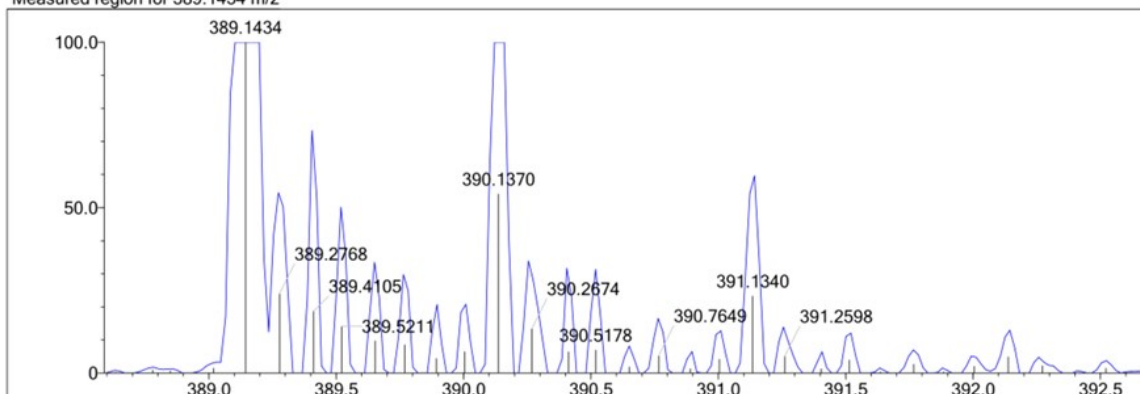

C22 H20 N4 O S [M+H]<sup>+</sup> : Predicted region for 389.1431 m/z

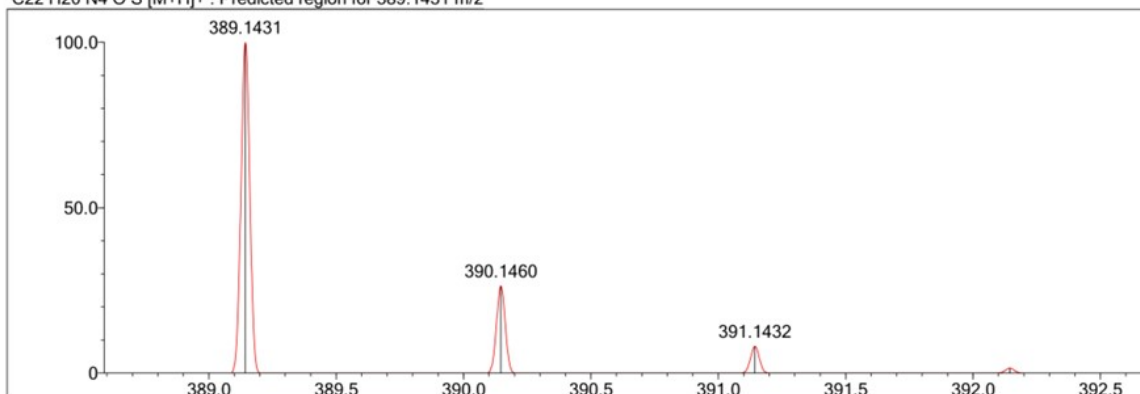

| Rank | Score | Formula (M)    | Ion                | Meas. m/z | Pred. m/z | Df. (mDa) | Df. (ppm) | Iso   | DBE  |
|------|-------|----------------|--------------------|-----------|-----------|-----------|-----------|-------|------|
| 1    | 28.35 | C22 H20 N4 O S | [M+H] <sup>+</sup> | 389.1434  | 389.1431  | 0.3       | 0.77      | 28.35 | 15.0 |

**Spectra 9. HRMS spectra of compound 3c**

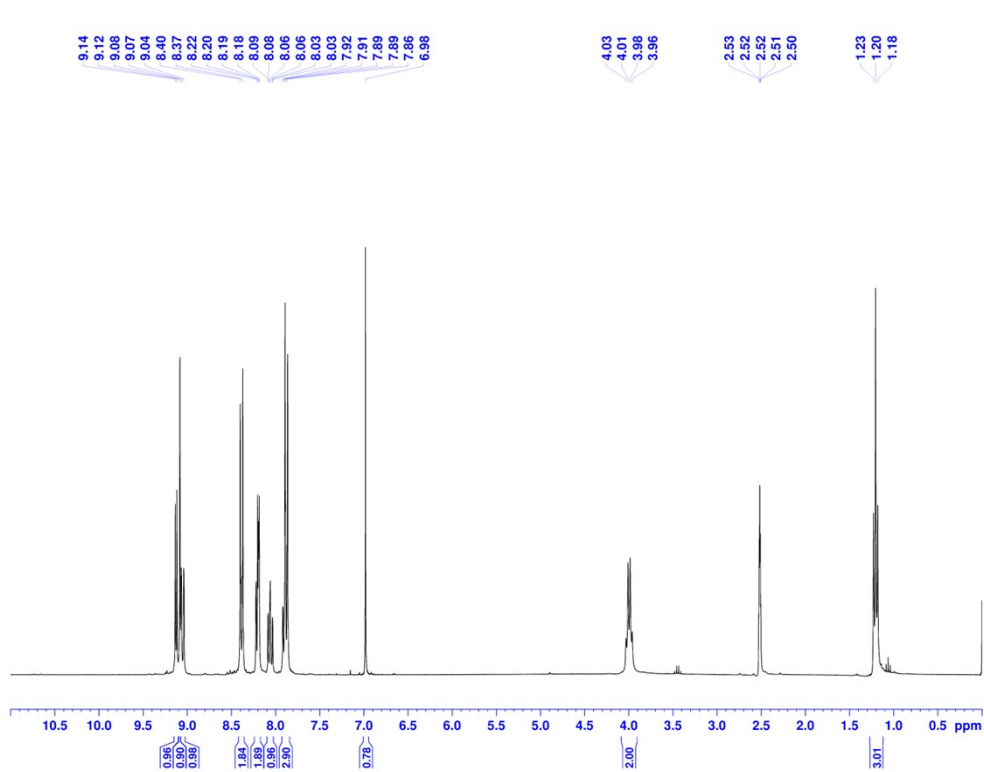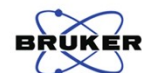

Current Data Parameters  
 NAME UMB-4  
 EXPNO 2  
 PROCNO 1

F2 - Acquisition Parameters  
 Date\_ 20241228  
 Time 11.44  
 INSTRUM FOURIER300  
 PROBHD 5 mm DUL 13C-1  
 PULPROG zg  
 TD 16384  
 SOLVENT DMSO  
 NS 16  
 DS 0  
 SWH 6103.516 Hz  
 FIDRES 0.372529 Hz  
 AQ 1.3421773 sec  
 RG 21.3366  
 DW 81.920 usec  
 DE 6.50 usec  
 TE 294.1 K  
 D1 3.00000000 sec  
 TD0 1

===== CHANNEL f1 =====  
 SFO1 300.1818537 MHz  
 NUC1 1H  
 P1 15.00 usec  
 PLW1 10.00000000 W

F2 - Processing parameters  
 SI 65536  
 SF 300.1799948 MHz  
 WDW EM  
 SSB 0  
 LB 0.30 Hz  
 GB 0  
 PC 1.00

Spectra 10. <sup>1</sup>H-NMR spectra of compound 3d

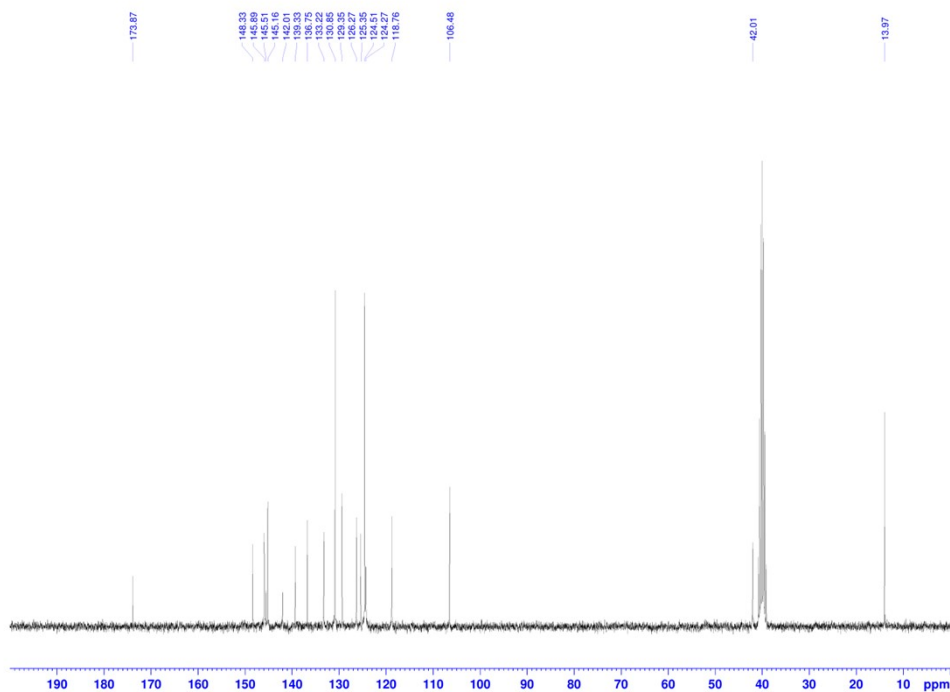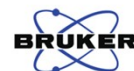

Current Data Parameters  
 NAME UMB-4  
 EXPNO 3  
 PROCNO 1

F2 - Acquisition Parameters  
 Date\_ 20241228  
 Time 11.46  
 INSTRUM FOURIER300  
 PROBHD 5 mm DUL 13C-1  
 PULPROG zgpg  
 TD 32768  
 SOLVENT DMSO  
 NS 2048  
 DS 1  
 SWH 24414.062 Hz  
 FIDRES 0.745058 Hz  
 AQ 0.6710886 sec  
 RG 501.187  
 DW 20.480 usec  
 DE 6.50 usec  
 TE 294.1 K  
 D1 1.00000000 sec  
 D11 0.03000000 sec  
 D31 0.00001500 sec  
 D32 0.89999998 sec  
 D40 0.00093990 sec  
 L4 23  
 L5 26  
 P32 90.00 usec  
 TD0 1

===== CHANNEL f1 =====  
 SFO1 75.4878687 MHz  
 NUC1 13C  
 P1 15.00 usec  
 PLW1 15.00000000 W

===== CHANNEL f2 =====  
 SFO2 300.1812007 MHz  
 NUC2 1H  
 CPDPRG2 waltz16  
 PCPD2 90.00 usec  
 PLW2 10.00000000 W  
 PLW12 0.20863999 W  
 PLW13 0.10495000 W

F2 - Processing parameters  
 SI 32768  
 SF 75.4803210 MHz  
 WDW EM  
 SSB 0  
 LB 1.00 Hz  
 GB 0  
 PC 1.40

Spectra 11. <sup>13</sup>C-NMR spectra of compound 3d

Data File: C:\LabSolutions\Data\Analiz\Derya\UMB-4\_24.lcd

| Elmt | Val. | Min | Max | Elmt | Val. | Min | Max | Elmt | Val. | Min | Max | Elmt | Val. | Min | Max | Use Adduct |
|------|------|-----|-----|------|------|-----|-----|------|------|-----|-----|------|------|-----|-----|------------|
| H    | 1    | 5   | 35  | O    | 2    | 0   | 4   | S    | 2    | 0   | 2   | Ru   | 2    | 0   | 0   | H          |
| C    | 4    | 9   | 35  | F    | 1    | 0   | 0   | Cl   | 1    | 0   | 0   | Pd   | 2    | 0   | 0   |            |
| N    | 3    | 4   | 8   | P    | 3    | 0   | 0   | Br   | 1    | 0   | 0   | I    | 3    | 0   | 0   |            |

Error Margin (ppm): 5  
 HC Ratio: unlimited  
 Max Isotopes: 3  
 MSn Iso RI (%): 10.00

DBE Range: 8.0 - 30.0  
 Apply N Rule: yes  
 Isotope RI (%): 1.00  
 MSn Logic Mode: AND

Electron Ions: both  
 Use MSn Info: yes  
 Isotope Res: 9000  
 Max Results: 50

Event#: 1 MS(E+) Ret. Time : 4.280 Scan#: 643

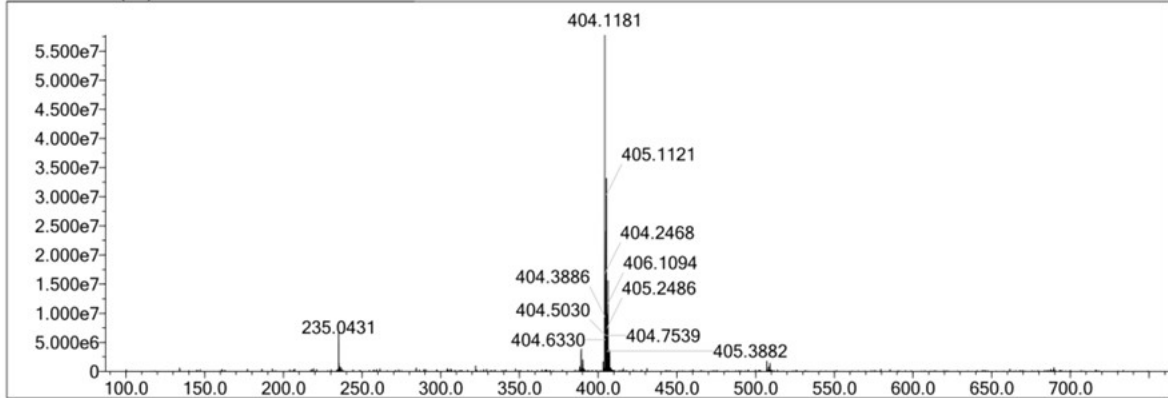

Measured region for 404.1181 m/z

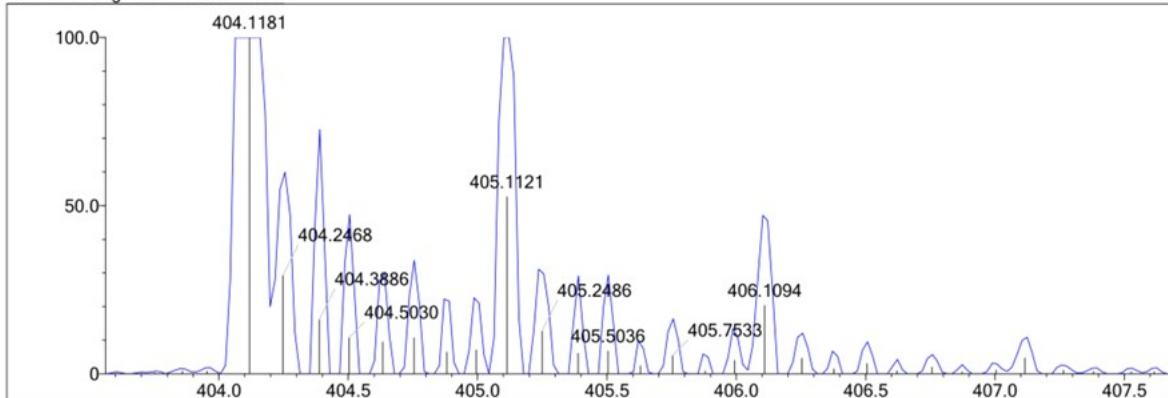

C21 H17 N5 O2 S [M+H]+ : Predicted region for 404.1176 m/z

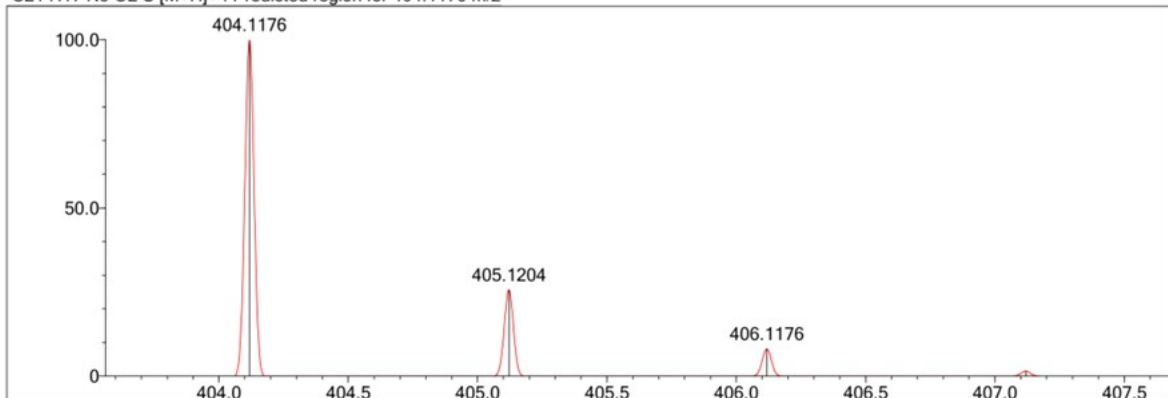

| Rank | Score | Formula (M)     | Ion                | Meas. m/z | Pred. m/z | Df. (mDa) | Df. (ppm) | Iso   | DBE  |
|------|-------|-----------------|--------------------|-----------|-----------|-----------|-----------|-------|------|
| 1    | 29.78 | C21 H17 N5 O2 S | [M+H] <sup>+</sup> | 404.1181  | 404.1176  | 0.5       | 1.24      | 29.96 | 16.0 |

Spectra 12. HRMS spectra of compound 3d

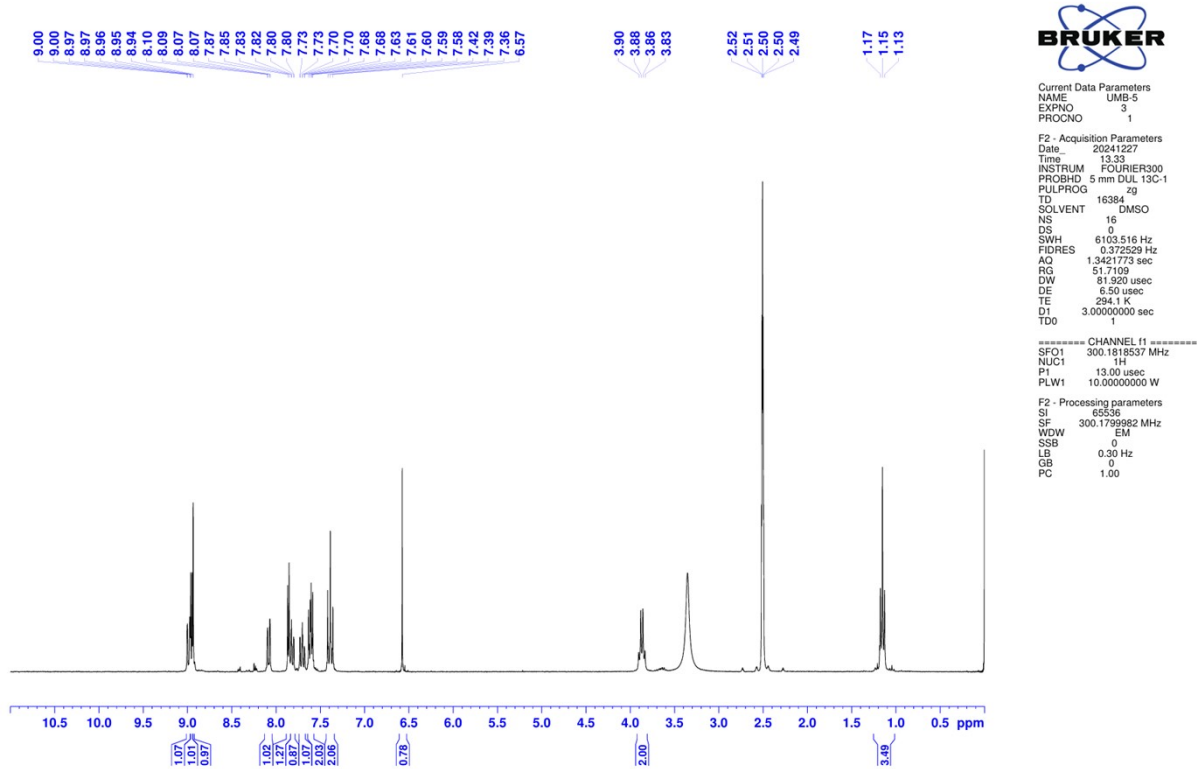

Spectra 13. <sup>1</sup>H-NMR spectra of compound 3e

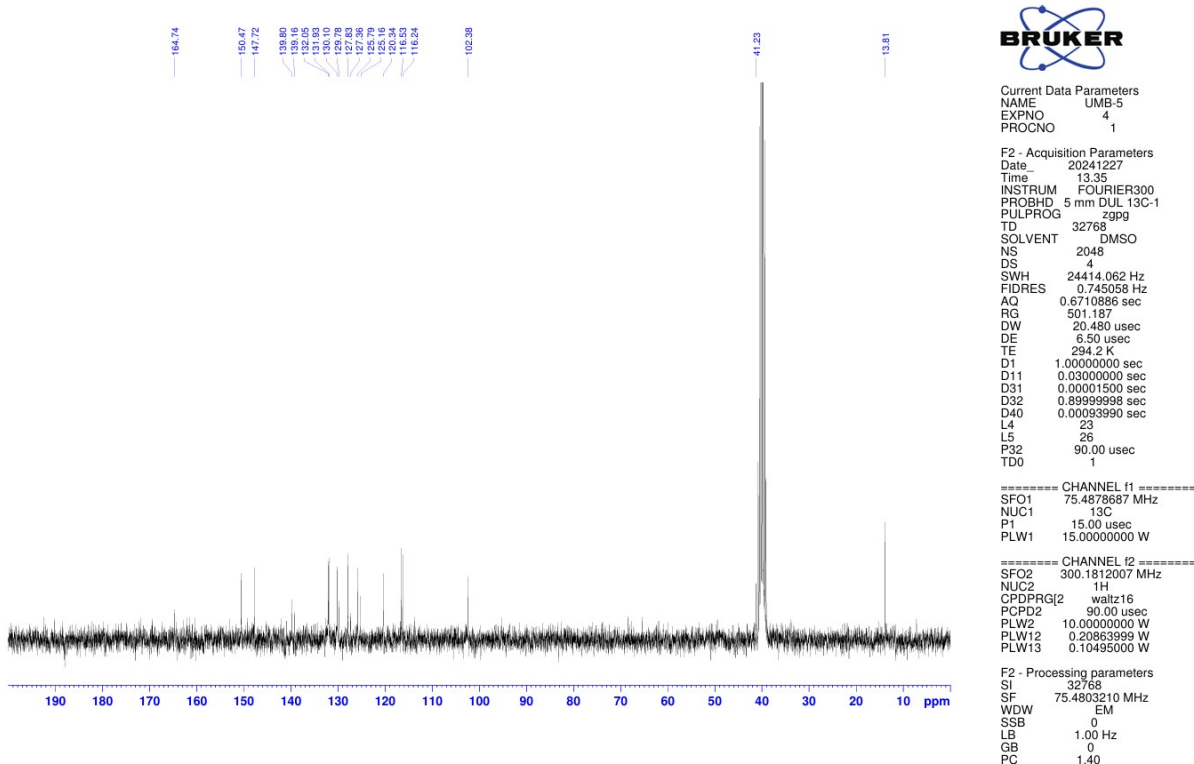

Spectra 14. <sup>13</sup>C-NMR spectra of compound 3e

Data File: C:\LabSolutions\Data\Analiz\Derya\UMB-5\_25.lcd

| Elmt | Val. | Min | Max | Elmt | Val. | Min | Max | Elmt | Val. | Min | Max | Elmt | Val. | Min | Max | Use Adduct |
|------|------|-----|-----|------|------|-----|-----|------|------|-----|-----|------|------|-----|-----|------------|
| H    | 1    | 5   | 35  | O    | 2    | 0   | 3   | S    | 2    | 0   | 2   | Ru   | 2    | 0   | 0   | H          |
| C    | 4    | 9   | 35  | F    | 1    | 0   | 1   | Cl   | 1    | 0   | 0   | Pd   | 2    | 0   | 0   |            |
| N    | 3    | 4   | 8   | P    | 3    | 0   | 0   | Br   | 1    | 0   | 0   | I    | 3    | 0   | 0   |            |

Error Margin (ppm): 5  
 HC Ratio: unlimited  
 Max Isotopes: 3  
 MSn Iso RI (%): 10.00

DBE Range: 8.0 - 30.0  
 Apply N Rule: yes  
 Isotope RI (%): 1.00  
 MSn Logic Mode: AND

Electron Ions: both  
 Use MSn Info: yes  
 Isotope Res: 9000  
 Max Results: 50

Event#: 1 MS(E+) Ret. Time : 4.307 Scan#: 647

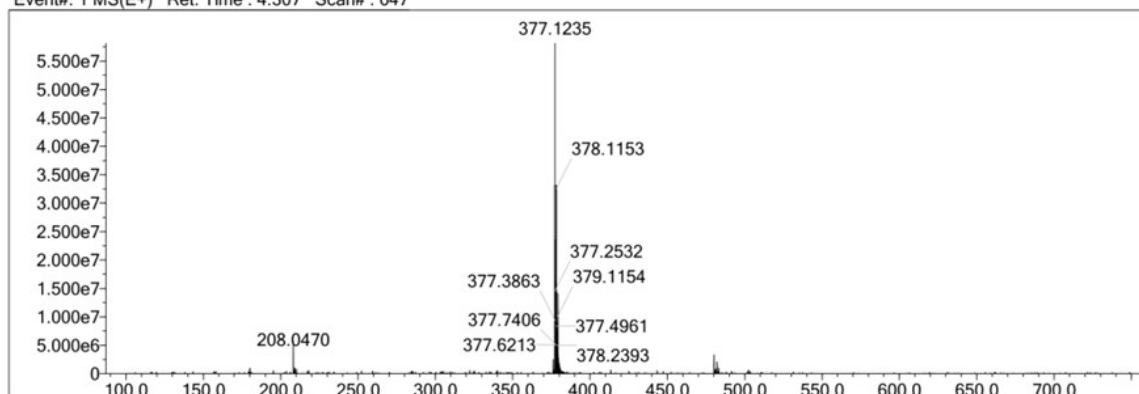

Measured region for 377.1235 m/z

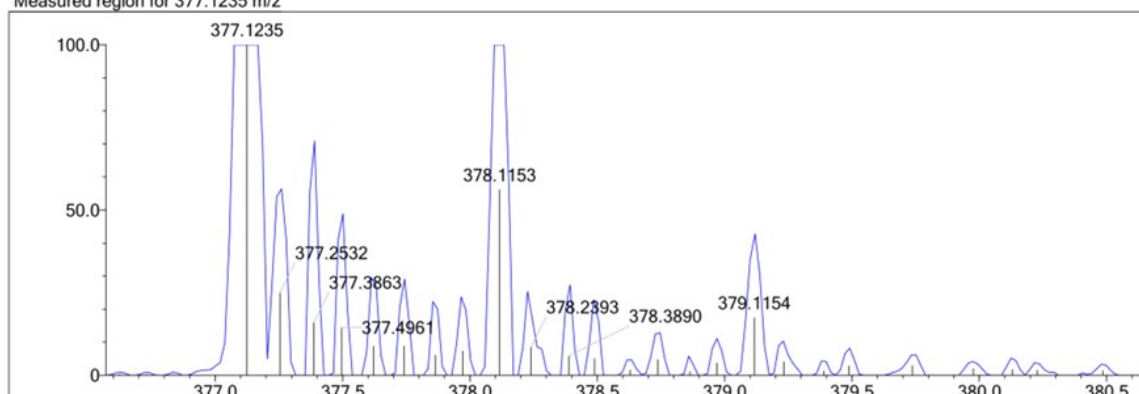

C21 H17 N4 F S [M+H]<sup>+</sup> : Predicted region for 377.1231 m/z

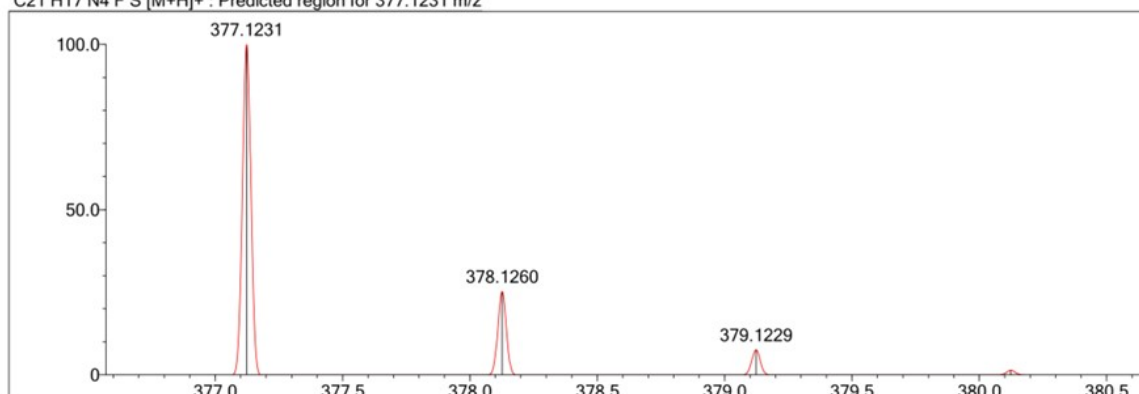

| Rank | Score | Formula (M)    | Ion                | Meas. m/z | Pred. m/z | Df. (mDa) | Df. (ppm) | Iso   | DBE  |
|------|-------|----------------|--------------------|-----------|-----------|-----------|-----------|-------|------|
| 1    | 26.07 | C21 H17 N4 F S | [M+H] <sup>+</sup> | 377.1235  | 377.1231  | 0.4       | 1.06      | 26.11 | 15.0 |

Spectra 15. HRMS spectra of compound 3e

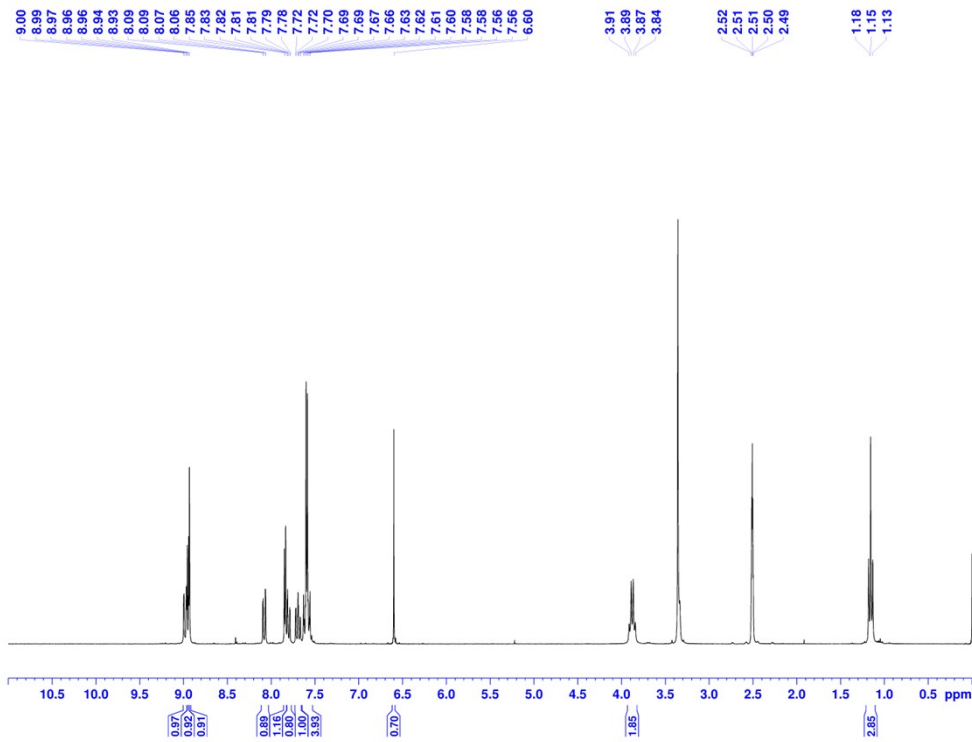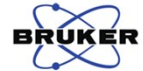

Current Data Parameters  
 NAME UMB-6.2  
 EXPNO 3  
 PROCNO 1

F2 - Acquisition Parameters  
 Date\_ 20241227  
 Time 9.51  
 INSTRUM FOURIER300  
 PROBHD 5 mm DUL 13C-1  
 PULPROG zg  
 TD 16384  
 SOLVENT DMSO  
 NS 16  
 DS 0  
 SWH 6103.516 Hz  
 FIDRES 0.372529 Hz  
 AQ 1.3421773 sec  
 RG 39.3552  
 DW 81.920 usec  
 DE 6.50 usec  
 TE 294.1 K  
 D1 3.00000000 sec  
 TD0 1

===== CHANNEL f1 =====  
 SFO1 300.1818537 MHz  
 NUC1 1H  
 P1 13.00 usec  
 PLW1 10.00000000 W

F2 - Processing parameters  
 SI 65536  
 SF 300.1789975 MHz  
 WDW EM  
 SSB 0  
 LB 0.30 Hz  
 GB 0  
 PC 1.00

Spectra 16.  $^1\text{H}$ -NMR spectra of compound 3f

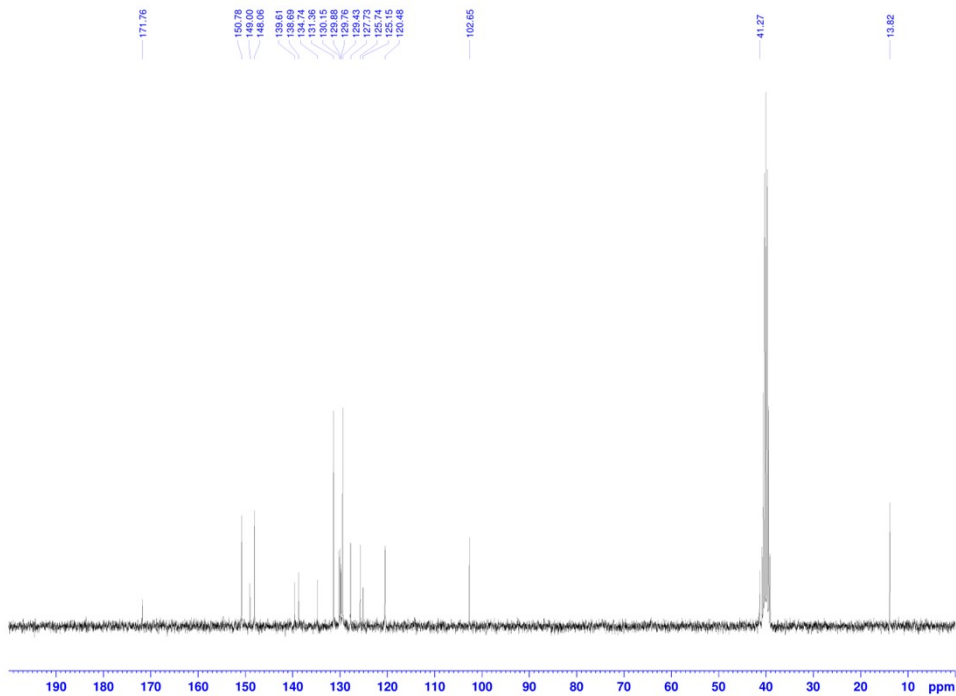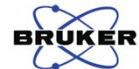

Current Data Parameters  
 NAME UMB-6.2  
 EXPNO 4  
 PROCNO 1

F2 - Acquisition Parameters  
 Date\_ 20241227  
 Time 9.53  
 INSTRUM FOURIER300  
 PROBHD 5 mm DUL 13C-1  
 PULPROG zgpg  
 TD 32768  
 SOLVENT DMSO  
 NS 2048  
 DS 4  
 SWH 24414.062 Hz  
 FIDRES 0.745059 Hz  
 AQ 0.6710886 sec  
 RG 501.187  
 DW 20.480 usec  
 DE 6.50 usec  
 TE 294.2 K  
 D1 1.00000000 sec  
 D11 0.03000000 sec  
 D31 0.00015000 sec  
 D32 0.89999999 sec  
 D40 0.00093990 sec  
 L4 23  
 L5 26  
 P32 90.00 usec  
 TD0 1

===== CHANNEL f1 =====  
 SFO1 75.4878687 MHz  
 NUC1 13C  
 P1 15.00 usec  
 PLW1 15.00000000 W

===== CHANNEL f2 =====  
 SFO2 300.1812007 MHz  
 NUC2 1H  
 CPDPRG2 waltz16  
 PCPD2 90.00 usec  
 PLW2 10.00000000 W  
 PLW12 0.20863999 W  
 PLW13 0.10495000 W

F2 - Processing parameters  
 SI 32768  
 SF 75.4803210 MHz  
 WDW EM  
 SSB 0  
 LB 1.00 Hz  
 GB 0  
 PC 1.40

Spectra 17.  $^{13}\text{C}$ -NMR spectra of compound 3f

Data File: C:\LabSolutions\Data\Analiz\Derya\UMB-6.2\_86.lcd

| Elmt | Val. | Min | Max | Elmt | Val. | Min | Max | Elmt | Val. | Min | Max | Elmt | Val. | Min | Max | Use Adduct |
|------|------|-----|-----|------|------|-----|-----|------|------|-----|-----|------|------|-----|-----|------------|
| H    | 1    | 15  | 30  | O    | 2    | 0   | 0   | S    | 2    | 1   | 1   | Ru   | 2    | 0   | 0   | H          |
| C    | 4    | 12  | 37  | F    | 1    | 0   | 0   | Cl   | 1    | 0   | 1   | Pd   | 2    | 0   | 0   |            |
| N    | 3    | 1   | 6   | P    | 3    | 0   | 0   | Br   | 1    | 0   | 0   | I    | 3    | 0   | 0   |            |

Error Margin (ppm): 10  
 HC Ratio: unlimited  
 Max Isotopes: 5  
 MSn Iso RI (%): 10.00

DBE Range: 5.0 - 20.0  
 Apply N Rule: no  
 Isotope RI (%): 1.00  
 MSn Logic Mode: AND

Electron Ions: both  
 Use MSn Info: yes  
 Isotope Res: 9000  
 Max Results: 50

Event#: 1 MS(E+) Ret. Time : 1.947 Scan#: 293

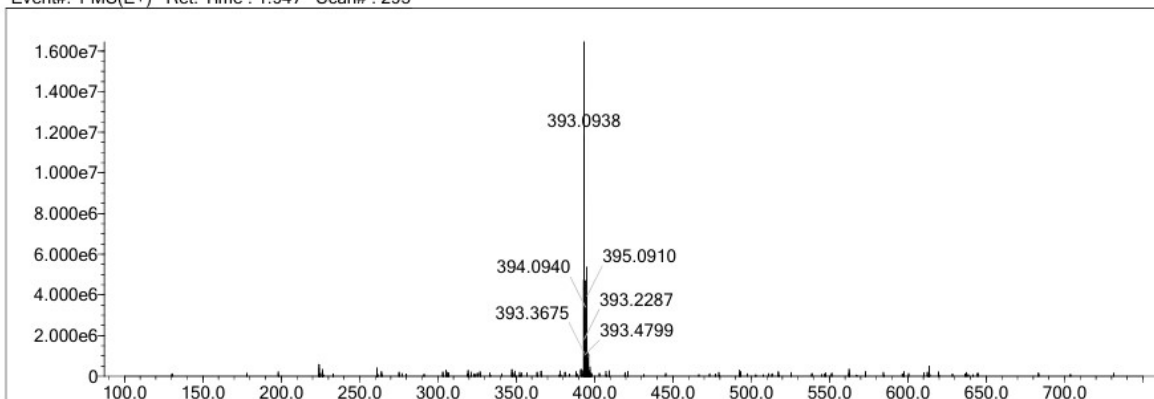

Measured region for 393.0938 m/z

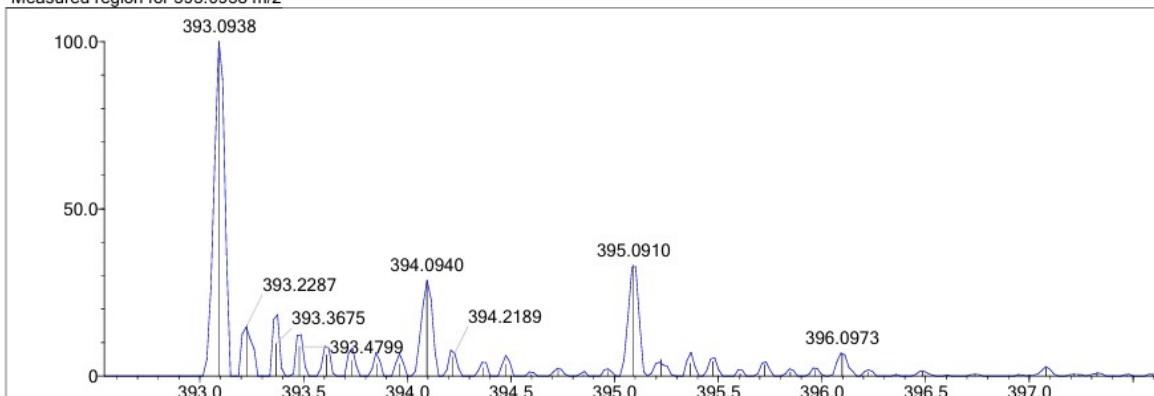

C21 H17 N4 S Cl [M+H]<sup>+</sup> : Predicted region for 393.0935 m/z

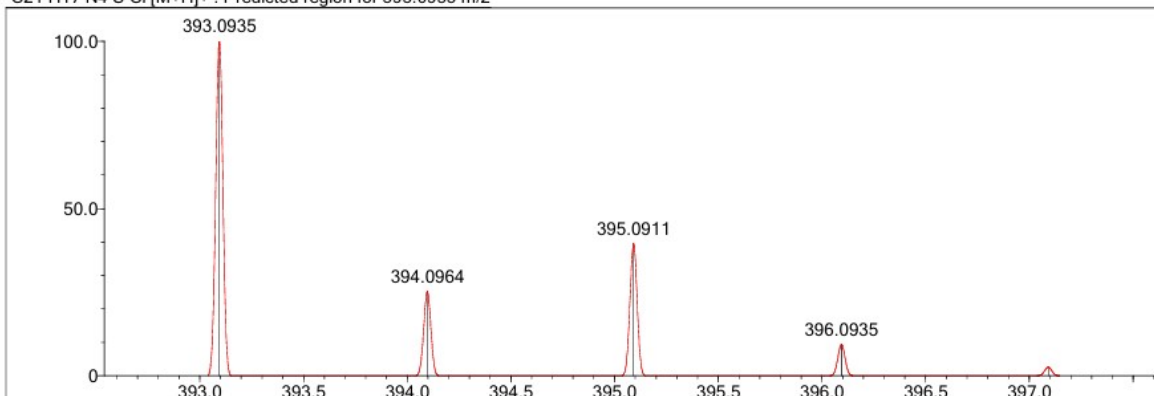

| Rank | Score | Formula (M)     | Ion                | Meas. m/z | Pred. m/z | Df. (mDa) | Df. (ppm) | Iso   | DBE  |
|------|-------|-----------------|--------------------|-----------|-----------|-----------|-----------|-------|------|
| 1    | 68.18 | C21 H17 N4 S Cl | [M+H] <sup>+</sup> | 393.0938  | 393.0935  | 0.3       | 0.76      | 68.18 | 15.0 |

**Spectra 18. HRMS spectra of compound 3f**

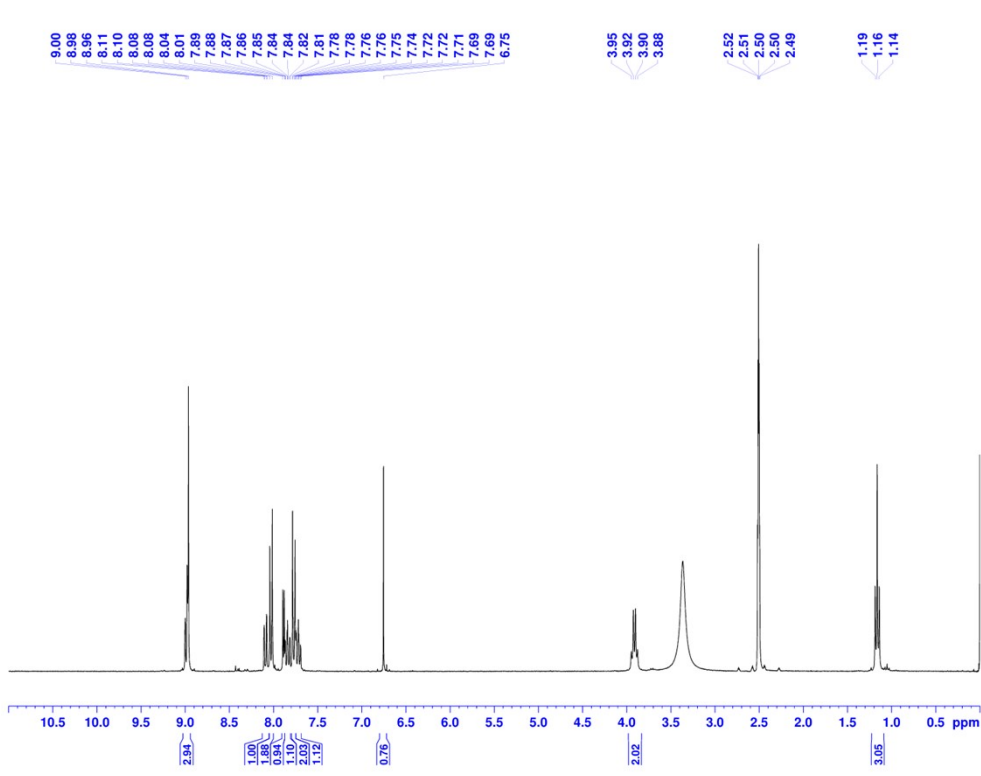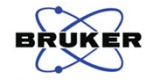

Current Data Parameters  
 NAME UMB-8  
 EXPNO 3  
 PROCNO 1

F2 - Acquisition Parameters  
 Date\_ 20241227  
 Time 10.53  
 INSTRUM FOURIER300  
 PROBHD 5 mm DUL 13C-1  
 PULPROG zg  
 TD 16384  
 SOLVENT DMSO  
 NS 16  
 DS 0  
 SWH 6103.516 Hz  
 FIDRES 0.372529 Hz  
 AQ 1.3421773 sec  
 RG 47.3558  
 DW 61.920 usec  
 DE 6.50 usec  
 TE 294.1 K  
 D1 3.00000000 sec  
 TD0 1

===== CHANNEL f1 =====  
 SFO1 300.1818537 MHz  
 NUC1 1H  
 P1 13.00 usec  
 PLW1 10.00000000 W

F2 - Processing parameters  
 SI 65536  
 SF 300.1799981 MHz  
 WDW EM  
 SSB 0  
 LB 0.30 Hz  
 GB 0  
 PC 1.00

Spectra 19. <sup>1</sup>H-NMR spectra of compound 3g

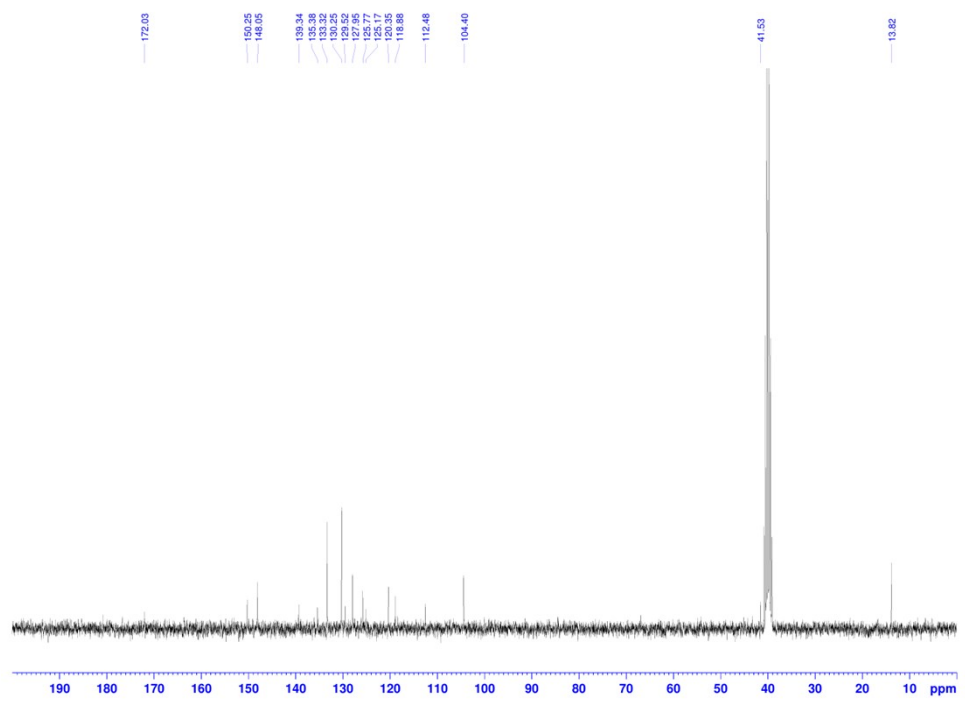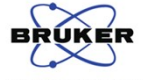

Current Data Parameters  
 NAME UMB-8  
 EXPNO 4  
 PROCNO 1

F2 - Acquisition Parameters  
 Date\_ 20241227  
 Time 10.55  
 INSTRUM FOURIER300  
 PROBHD 5 mm DUL 13C-1  
 PULPROG zgpg  
 TD 32768  
 SOLVENT DMSO  
 NS 2048  
 DS 4  
 SWH 24414.062 Hz  
 FIDRES 0.745058 Hz  
 AQ 0.6710886 sec  
 RG 501.187  
 DW 20.480 usec  
 DE 6.50 usec  
 TE 294.2 K  
 D1 1.00000000 sec  
 D11 0.03000000 sec  
 D31 0.00001500 sec  
 D32 0.89999998 sec  
 D40 0.00093990 sec  
 L4 23  
 L5 26  
 P32 90.00 usec  
 TD0 1

===== CHANNEL f1 =====  
 SFO1 75.4878687 MHz  
 NUC1 13C  
 P1 15.00 usec  
 PLW1 15.00000000 W

===== CHANNEL f2 =====  
 SFO2 300.1812007 MHz  
 NUC2 1H  
 CPDPRG2 waltz16  
 PCPD2 90.00 usec  
 PLW2 10.00000000 W  
 PLW12 0.20863999 W  
 PLW13 0.10495000 W

F2 - Processing parameters  
 SI 32768  
 SF 75.4803210 MHz  
 WDW EM  
 SSB 0  
 LB 1.00 Hz  
 GB 0  
 PC 1.40

Spectra 20. <sup>13</sup>C-NMR spectra of compound 3g

Data File: C:\LabSolutions\Data\Analiz\Derya\UMB-8\_27.lcd

| Elmt | Val. | Min | Max | Elmt | Val. | Min | Max | Elmt | Val. | Min | Max | Elmt | Val. | Min | Max | Use Adduct |
|------|------|-----|-----|------|------|-----|-----|------|------|-----|-----|------|------|-----|-----|------------|
| H    | 1    | 5   | 35  | O    | 2    | 0   | 0   | S    | 2    | 0   | 2   | Ru   | 2    | 0   | 0   | H          |
| C    | 4    | 9   | 35  | F    | 1    | 0   | 1   | Cl   | 1    | 0   | 0   | Pd   | 2    | 0   | 0   |            |
| N    | 3    | 4   | 8   | P    | 3    | 0   | 0   | Br   | 1    | 0   | 0   | I    | 3    | 0   | 0   |            |

Error Margin (ppm): 5  
 HC Ratio: unlimited  
 Max Isotopes: 3  
 MSn Iso RI (%): 10.00

DBE Range: 8.0 - 30.0  
 Apply N Rule: yes  
 Isotope RI (%): 1.00  
 MSn Logic Mode: AND

Electron Ions: both  
 Use MSn Info: yes  
 Isotope Res: 9000  
 Max Results: 50

Event#: 1 MS(E+) Ret. Time : 3.853 Scan#: 579

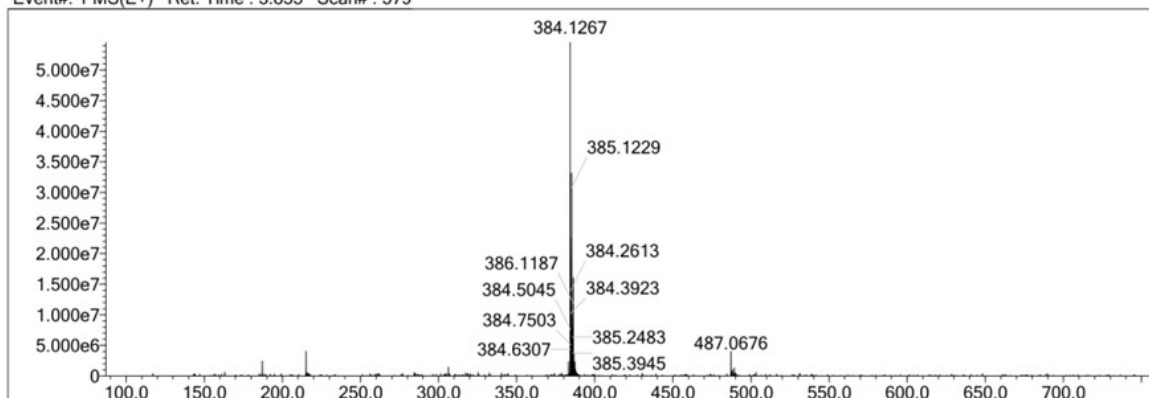

Measured region for 384.1267 m/z

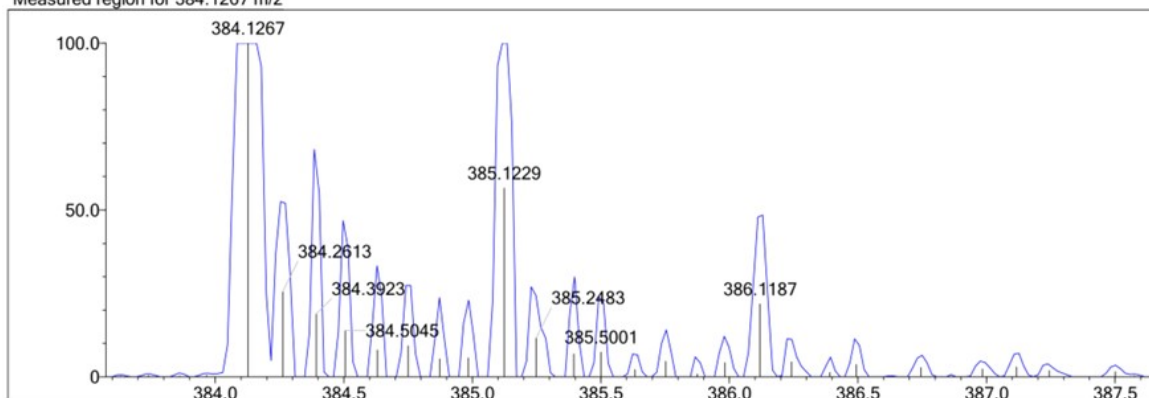

C22 H17 N5 S [M+H]<sup>+</sup> : Predicted region for 384.1277 m/z

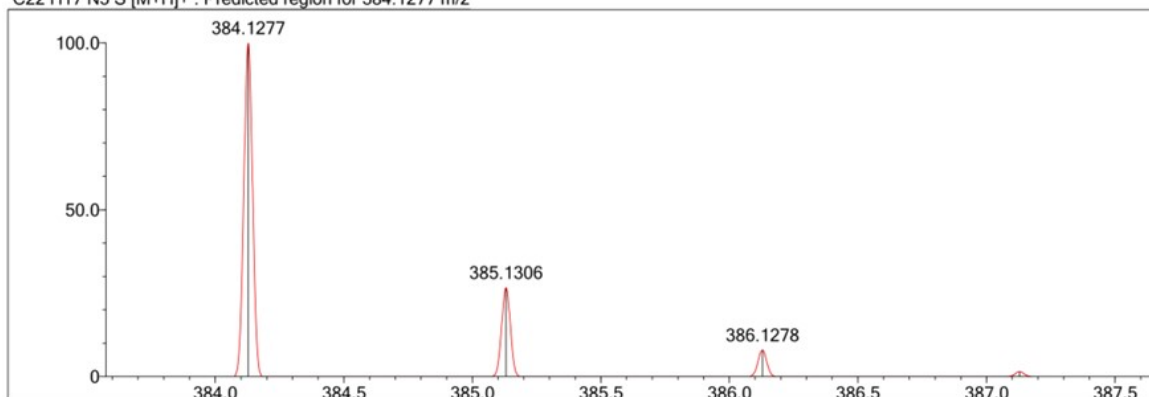

| Rank | Score | Formula (M)  | Ion                | Meas. m/z | Pred. m/z | Df. (mDa) | Df. (ppm) | Iso   | DBE  |
|------|-------|--------------|--------------------|-----------|-----------|-----------|-----------|-------|------|
| 1    | 21.72 | C22 H17 N5 S | [M+H] <sup>+</sup> | 384.1267  | 384.1277  | -1.0      | -2.60     | 22.62 | 17.0 |

Spectra 21. HRMS spectra of compound 3g

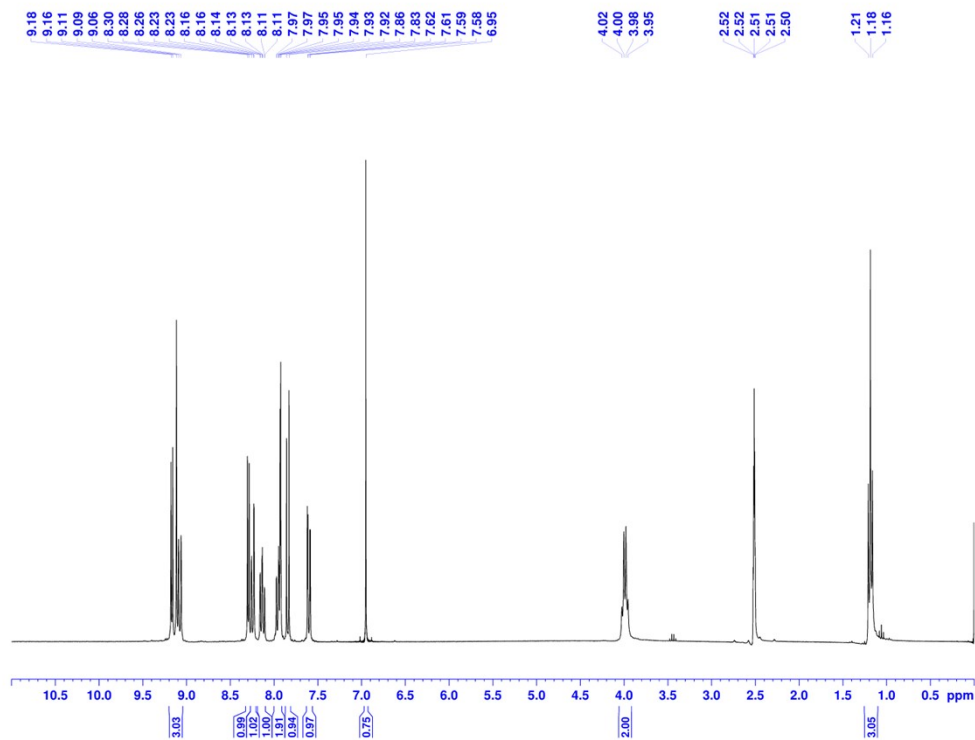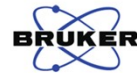

Current Data Parameters  
 NAME UMB-10  
 EXPNO 1  
 PROCNO 1

F2 - Acquisition Parameters  
 Date\_ 20241227  
 Time 18:39  
 INSTRUM FOURIER300  
 PROBHD 5 mm DUL 13C-1  
 PULPROG zg  
 TD 16384  
 SOLVENT DMSO  
 NS 16  
 DS 0  
 SWH 6103.516 Hz  
 FIDRES 0.372529 Hz  
 AQ 1.3421773 sec  
 RG 29.7739  
 DW 81.920 usec  
 DE 6.50 usec  
 TE 294.2 K  
 D1 3.00000000 sec  
 TD0 1

===== CHANNEL f1 =====  
 SFO1 300.1818537 MHz  
 NUC1 1H  
 P1 13.00 usec  
 PLW1 10.00000000 W  
 F2 - Processing parameters  
 SI 65536  
 SF 300.179868 MHz  
 WDW EM  
 SSB 0  
 LB 0.0 Hz  
 GB 0  
 PC 1.00

Spectra 22. <sup>1</sup>H-NMR spectra of compound 3h

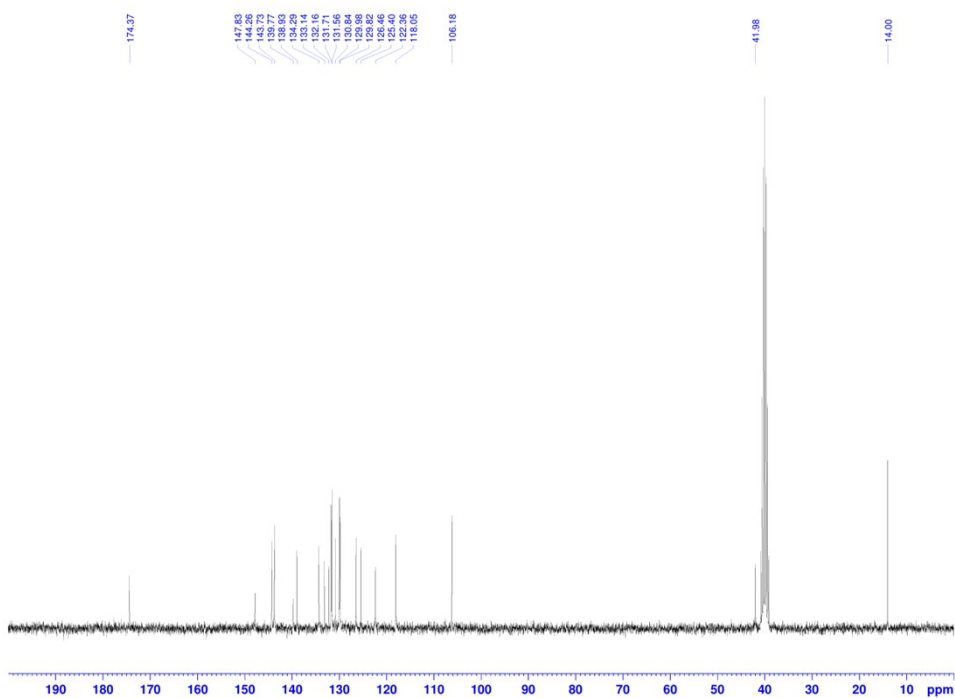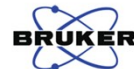

Current Data Parameters  
 NAME UMB-10  
 EXPNO 2  
 PROCNO 1

F2 - Acquisition Parameters  
 Date\_ 20241227  
 Time 18:41  
 INSTRUM FOURIER300  
 PROBHD 5 mm DUL 13C-1  
 PULPROG zgpg  
 TD 32768  
 SOLVENT DMSO  
 NS 2048  
 DS 4  
 SWH 24414.062 Hz  
 FIDRES 0.745058 Hz  
 AQ 0.6710886 sec  
 RG 501.187  
 DW 20.480 usec  
 DE 6.50 usec  
 TE 294.2 K  
 D1 1.00000000 sec  
 D11 0.03000000 sec  
 D31 0.00001500 sec  
 D32 0.89999998 sec  
 D40 0.00003990 sec  
 L4 23  
 L5 26  
 P32 90.00 usec  
 TD0 1

===== CHANNEL f1 =====  
 SFO1 75.4878687 MHz  
 NUC1 13C  
 P1 15.00 usec  
 PLW1 15.00000000 W  
 ===== CHANNEL f2 =====  
 SFO2 300.1812007 MHz  
 NUC2 1H  
 CPDPRG2 waltz16  
 PCPD2 90.00 usec  
 PLW2 10.00000000 W  
 PLW12 0.20853998 W  
 PLW13 0.10495000 W

F2 - Processing parameters  
 SI 32768  
 SF 75.4803210 MHz  
 WDW EM  
 SSB 0  
 LB 1.00 Hz  
 GB 0  
 PC 1.40

Spectra 23. <sup>13</sup>C-NMR spectra of compound 3h

Data File: C:\LabSolutions\Data\Analiz\Derya\UMB-10\_29.lcd

| Elmt | Val. | Min | Max | Elmt | Val. | Min | Max | Elmt | Val. | Min | Max | Elmt | Val. | Min | Max | Use Adduct |
|------|------|-----|-----|------|------|-----|-----|------|------|-----|-----|------|------|-----|-----|------------|
| H    | 1    | 5   | 35  | O    | 2    | 0   | 0   | S    | 2    | 0   | 2   | Ru   | 2    | 0   | 0   | H          |
| C    | 4    | 9   | 35  | F    | 1    | 0   | 0   | Cl   | 1    | 0   | 2   | Pd   | 2    | 0   | 0   |            |
| N    | 3    | 4   | 8   | P    | 3    | 0   | 0   | Br   | 1    | 0   | 0   | I    | 3    | 0   | 0   |            |

Error Margin (ppm): 10  
 HC Ratio: unlimited  
 Max Isotopes: 3  
 MSn Iso RI (%): 10.00

DBE Range: 8.0 - 19.0  
 Apply N Rule: yes  
 Isotope RI (%): 1.00  
 MSn Logic Mode: AND

Electron Ions: both  
 Use MSn Info: yes  
 Isotope Res: 9000  
 Max Results: 50

Event#: 1 MS(E+) Ret. Time : 7.600 Scan#: 1141

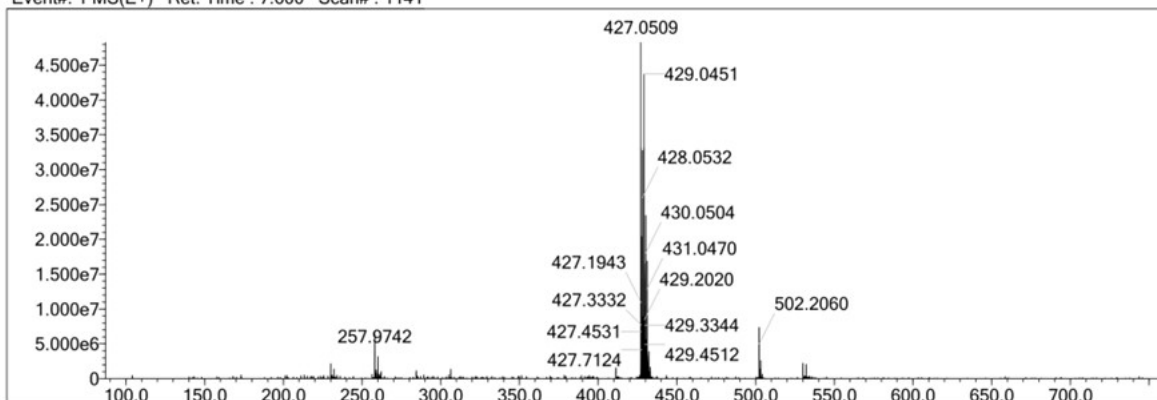

Measured region for 427.0509 m/z

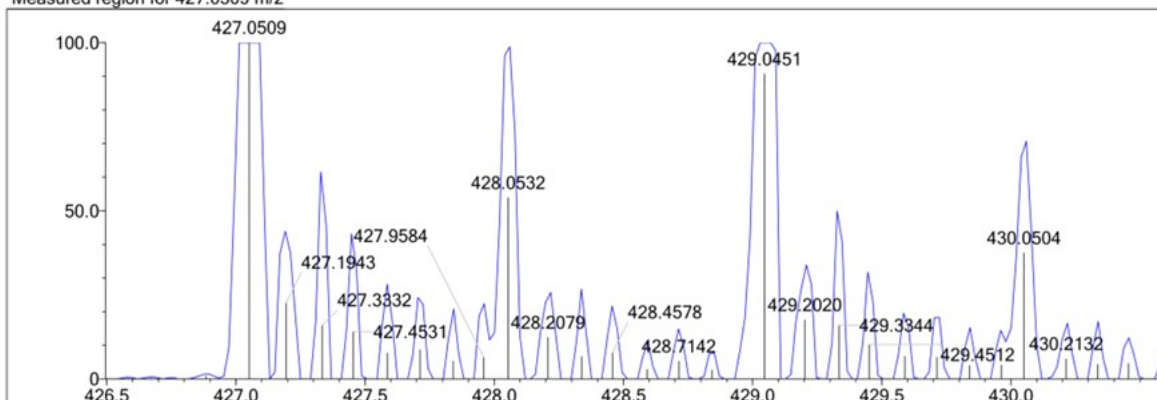

C21 H16 N4 S Cl2 [M+H]<sup>+</sup> : Predicted region for 427.0545 m/z

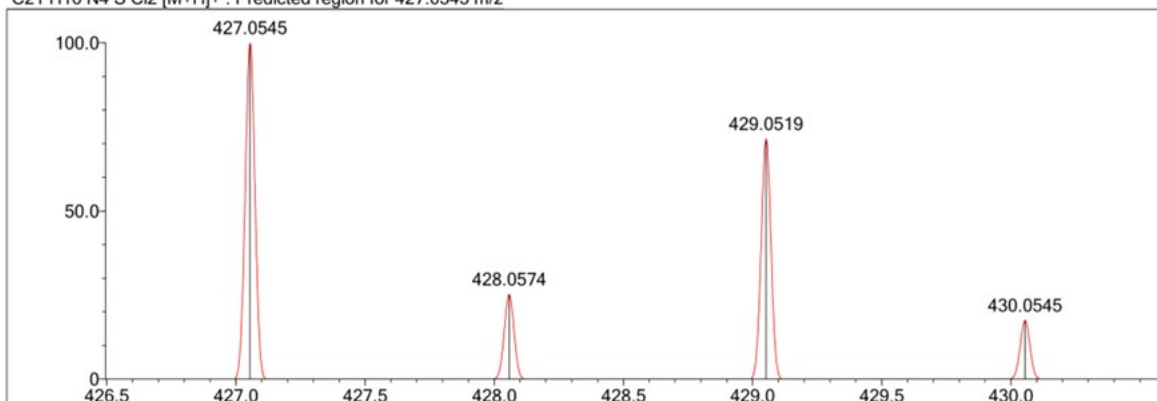

| Rank | Score | Formula (M)      | Ion                | Meas. m/z | Pred. m/z | Df. (mDa) | Df. (ppm) | Iso   | DBE  |
|------|-------|------------------|--------------------|-----------|-----------|-----------|-----------|-------|------|
| 1    | 20.23 | C21 H16 N4 S Cl2 | [M+H] <sup>+</sup> | 427.0509  | 427.0545  | -3.6      | -8.43     | 36.31 | 15.0 |

Spectra 24. HRMS spectra of compound 3h

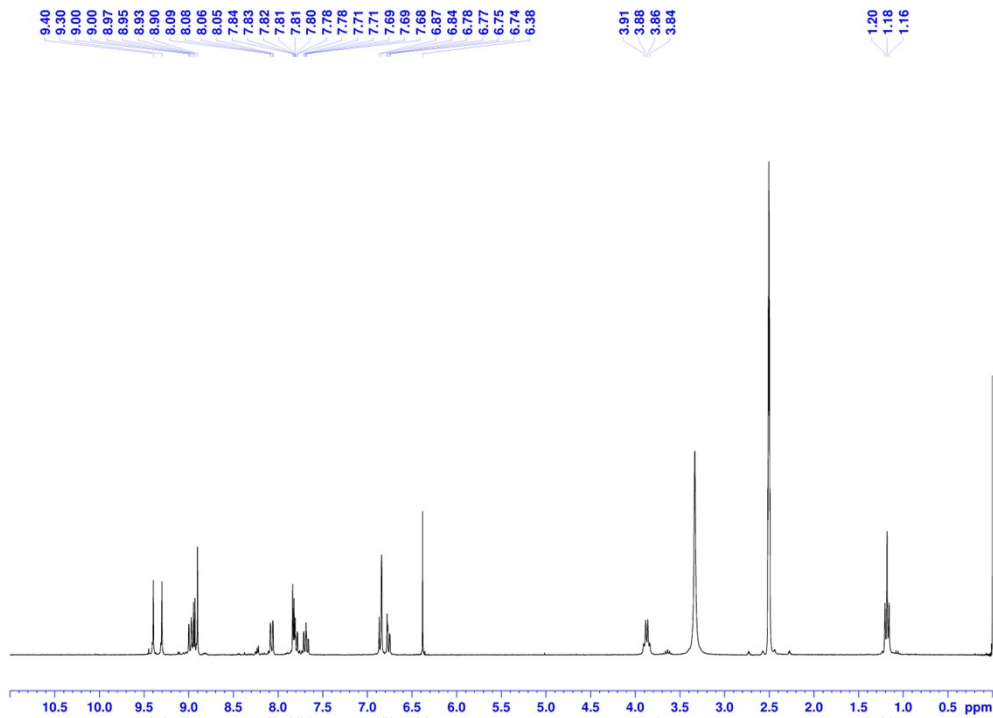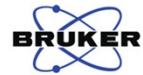

Current Data Parameters  
 NAME: UMB-11-Mayys  
 EXPNO: 3  
 PROCNO: 1

F2 - Acquisition Parameters  
 Date\_: 20250515  
 Time: 11.17  
 INSTRUM: FOURIER300  
 PROBHD: 5 mm DUL 13C-1  
 PULPROG: zg  
 TD: 16384  
 SOLVENT: DMSO  
 NS: 16  
 DS: 0  
 SWH: 6103.516 Hz  
 FIDRES: 0.372529 Hz  
 AQ: 1.3421773 sec  
 RG: 59.8758  
 DW: 81.920 usec  
 DE: 6.50 usec  
 TE: 297.0 K  
 D1: 3.00000000 sec  
 TDO: 1

===== CHANNEL f1 =====  
 SFO1: 300.1818337 MHz  
 NUC1: 1H  
 P1: 13.00 usec  
 PLW1: 10.00000000 W

F2 - Processing parameters  
 SI: 6536  
 SF: 300.1799991 MHz  
 WDW: EM  
 SSB: 0  
 LB: 0.30 Hz  
 GB: 0  
 PC: 1.00

Spectra 25. <sup>1</sup>H-NMR spectra of compound 3i

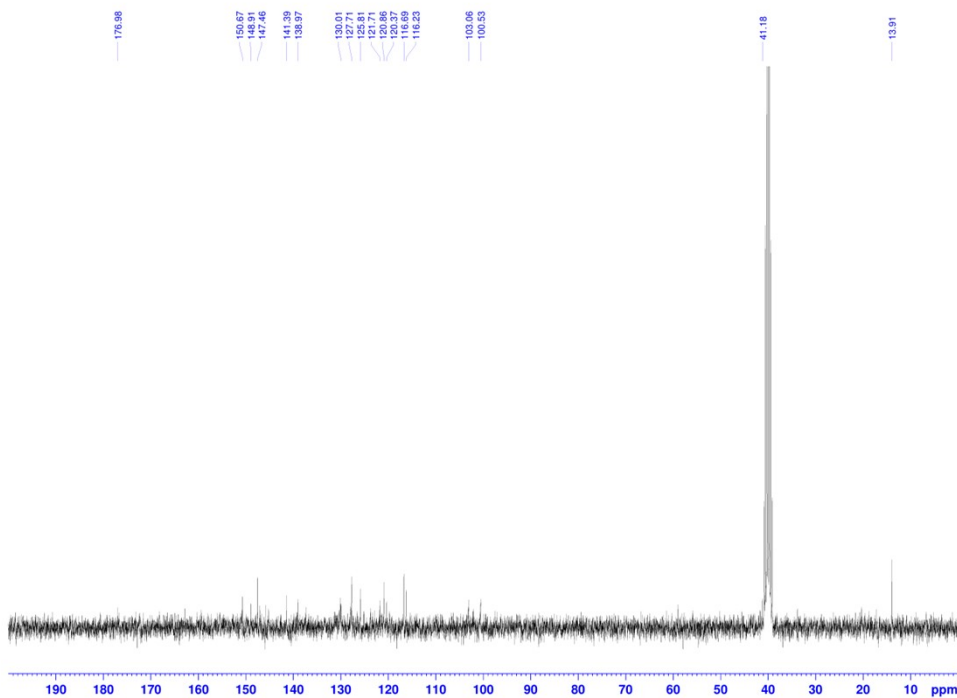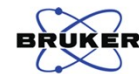

Current Data Parameters  
 NAME: UMB-11-Mayys  
 EXPNO: 4  
 PROCNO: 1

F2 - Acquisition Parameters  
 Date\_: 20250515  
 Time: 11.19  
 INSTRUM: FOURIER300  
 PROBHD: 5 mm DUL 13C-1  
 PULPROG: zgpg  
 TD: 32768  
 SOLVENT: DMSO  
 NS: 2048  
 DS: 4  
 SWH: 24414.062 Hz  
 FIDRES: 0.745058 Hz  
 AQ: 0.6710886 sec  
 RG: 501.187  
 DW: 20.480 usec  
 DE: 6.50 usec  
 TE: 296.9 K  
 D1: 1.00000000 sec  
 D11: 0.03000000 sec  
 D31: 0.00015000 sec  
 D32: 0.89999998 sec  
 D40: 0.00093990 sec  
 L4: 23  
 L5: 26  
 P32: 90.00 usec  
 TDO: 1

===== CHANNEL f1 =====  
 SFO1: 75.4878687 MHz  
 NUC1: 13C  
 P1: 15.00 usec  
 PLW1: 15.00000000 W

===== CHANNEL f2 =====  
 SFO2: 300.1812007 MHz  
 NUC2: 1H  
 CPDPRG2: waltz16  
 PCPD2: 90.00 usec  
 PLW2: 10.00000000 W  
 PLW12: 0.20863999 W  
 PLW13: 0.10495000 W

F2 - Processing parameters  
 SI: 32768  
 SF: 75.4803210 MHz  
 WDW: EM  
 SSB: 0  
 LB: 1.00 Hz  
 GB: 0  
 PC: 1.40

Spectra 26. <sup>13</sup>C-NMR spectra of compound 3i

Data File: C:\LabSolutions\Data\Analiz\Derya\UMB-11\_30.lcd

| Elmt | Val. | Min | Max | Elmt | Val. | Min | Max | Elmt | Val. | Min | Max | Elmt | Val. | Min | Max | Use Adduct |
|------|------|-----|-----|------|------|-----|-----|------|------|-----|-----|------|------|-----|-----|------------|
| H    | 1    | 5   | 35  | O    | 2    | 2   | 2   | S    | 2    | 0   | 2   | Ru   | 2    | 0   | 0   | H          |
| C    | 4    | 9   | 35  | F    | 1    | 0   | 0   | Cl   | 1    | 0   | 2   | Pd   | 2    | 0   | 0   |            |
| N    | 3    | 4   | 8   | P    | 3    | 0   | 0   | Br   | 1    | 0   | 0   | I    | 3    | 0   | 0   |            |

Error Margin (ppm): 5  
 HC Ratio: unlimited  
 Max Isotopes: 3  
 MSn Iso RI (%): 10.00

DBE Range: 8.0 - 19.0  
 Apply N Rule: yes  
 Isotope RI (%): 1.00  
 MSn Logic Mode: AND

Electron Ions: both  
 Use MSn Info: yes  
 Isotope Res: 9000  
 Max Results: 50

Event#: 1 MS(E+) Ret. Time : 2.533 Scan#: 381

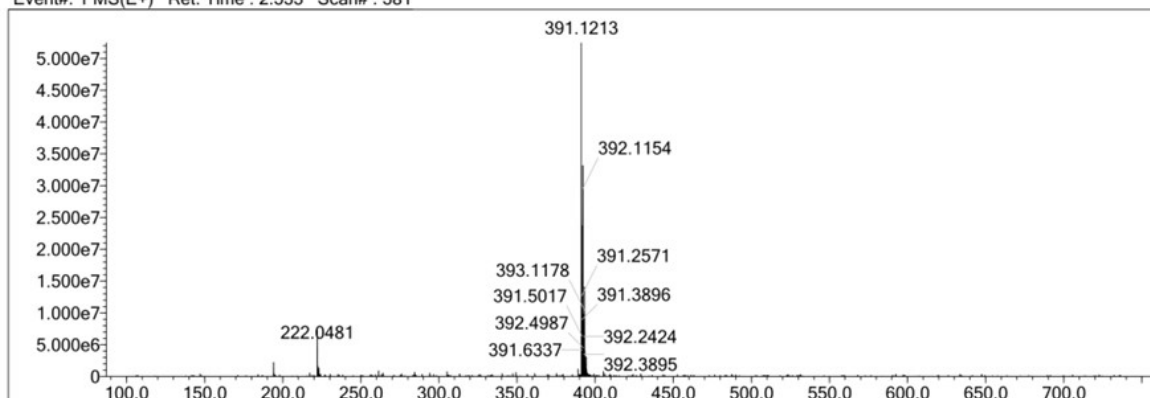

Measured region for 391.1213 m/z

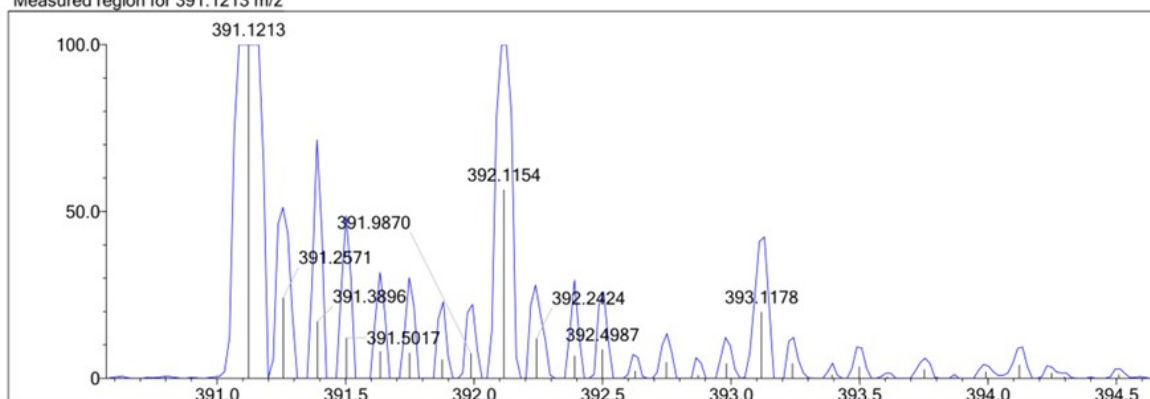C21 H18 N4 O2 S [M+H]<sup>+</sup> : Predicted region for 391.1223 m/z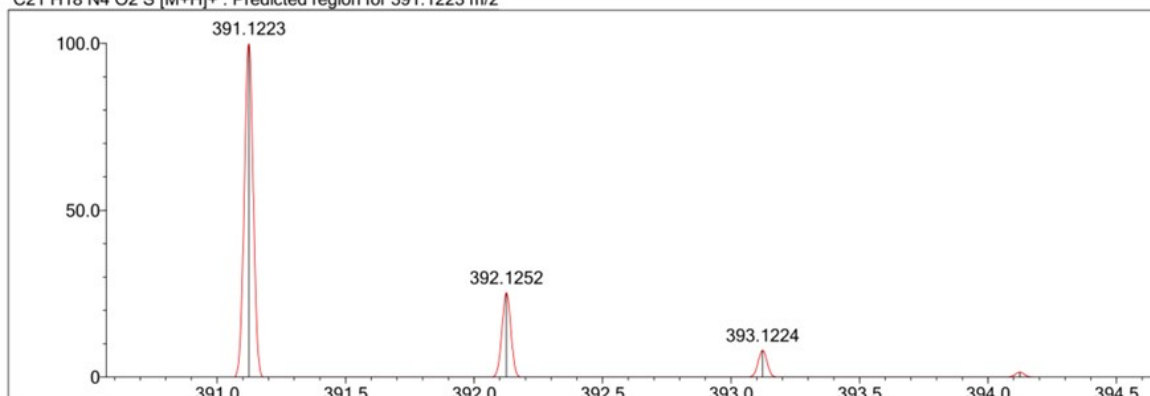

| Rank | Score | Formula (M)     | Ion                | Meas. m/z | Pred. m/z | Df. (mDa) | Df. (ppm) | Iso   | DBE  |
|------|-------|-----------------|--------------------|-----------|-----------|-----------|-----------|-------|------|
| 1    | 30.03 | C21 H18 N4 O2 S | [M+H] <sup>+</sup> | 391.1213  | 391.1223  | -1.0      | -2.56     | 31.25 | 15.0 |

## Spectra 27. HRMS spectra of compound 3i

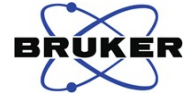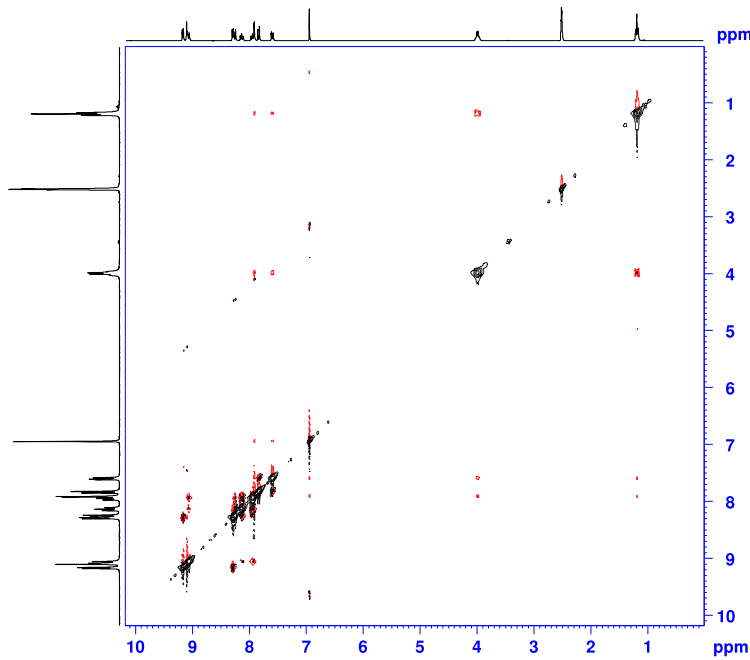

```
Current Data Parameters
NAME      UMB-10
EXFNO    22
PROCNO    1

F2 - Acquisition Parameters
Date_     20250218
Time      23.14
INSTRUM   FOURIER300
PROBHD    5 mm DUL 13C-1
PULPROG   noesyph
TD         2048
SOLVENT   DMSO
NS         64
DS         4
SWH        3051.758 Hz
FIDRES    1.490116 Hz
AQ         0.3355443 sec
RG         39.767
DE         163.840 usec
TE         299.9 K
D0         0.00014725 sec
D1         1.97304797 sec
D8         0.20000001 sec
D33        0.00016380 sec
INO        0.00032760 sec

===== CHANNEL f1 =====
SF01      300.1815269 MHz
NUC1      1H
P1         13.00 usec
PLW1      10.00000000 W

F1 - Acquisition parameters
TD         256
SF01      300.1815 MHz
FIDRES    11.923941 Hz
SW        10.183 ppm
FMODE     TPPI

F2 - Processing parameters
SI         1024
SF         300.1799969 MHz
WDW        QSINE
SSB        2
LB         0 Hz
GB         0
FC         1.00

F1 - Processing parameters
SI         1024
MC2        TPPI
SF         300.1799969 MHz
WDW        QSINE
SSB        2
LB         0 Hz
GB         0
```

Spectra 28. NOESY spectra of compound 3i

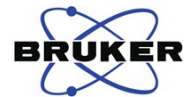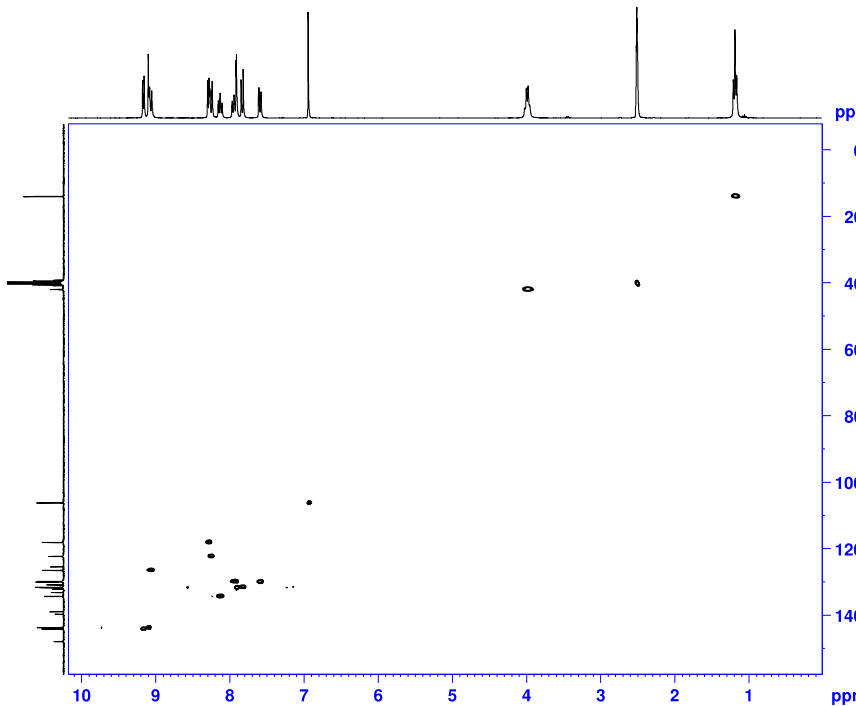

```
Current Data Parameters
NAME      UMB-10
EXFNO    21
PROCNO    1

F2 - Acquisition Parameters
Date_     20250218
Time      23.14
INSTRUM   FOURIER300
PROBHD    5 mm DUL 13C-1
PULPROG   hsqcph3
TD         2048
SOLVENT   DMSO
NS         64
DS         4
SWH        3051.758 Hz
FIDRES    1.490116 Hz
AQ         0.3355443 sec
RG         39.767
DE         163.840 usec
TE         299.9 K
D0         0.00014725 sec
D1         1.97304797 sec
D8         0.20000001 sec
D33        0.00016380 sec
INO        0.00032760 sec

===== CHANNEL f1 =====
SF01      300.1815269 MHz
NUC1      1H
P1         13.00 usec
PLW1      10.00000000 W

===== CHANNEL f2 =====
SF02      125.7603500 MHz
NUC2      13C
P2         13.00 usec
PLW2      10.00000000 W

===== GRADIENT CHANNEL =====
GRNAM[1]  GR11
GRNAM[2]  GR12
GRNAM[3]  GR13
GR11      80.00 u
GR12      20.14 u
GR13      1000.00 usec

F1 - Acquisition parameters
TD         256
SF01      300.1815 MHz
FIDRES    11.923941 Hz
SW        10.183 ppm
FMODE     TPPI

F2 - Processing parameters
SI         1024
SF         300.1799969 MHz
WDW        QSINE
SSB        2
LB         0 Hz
GB         0
FC         1.00

F1 - Processing parameters
SI         1024
MC2        TPPI
SF         300.1799969 MHz
WDW        QSINE
SSB        2
LB         0 Hz
GB         0
```

Spectra 29. HSQC spectra of compound 3i

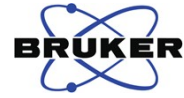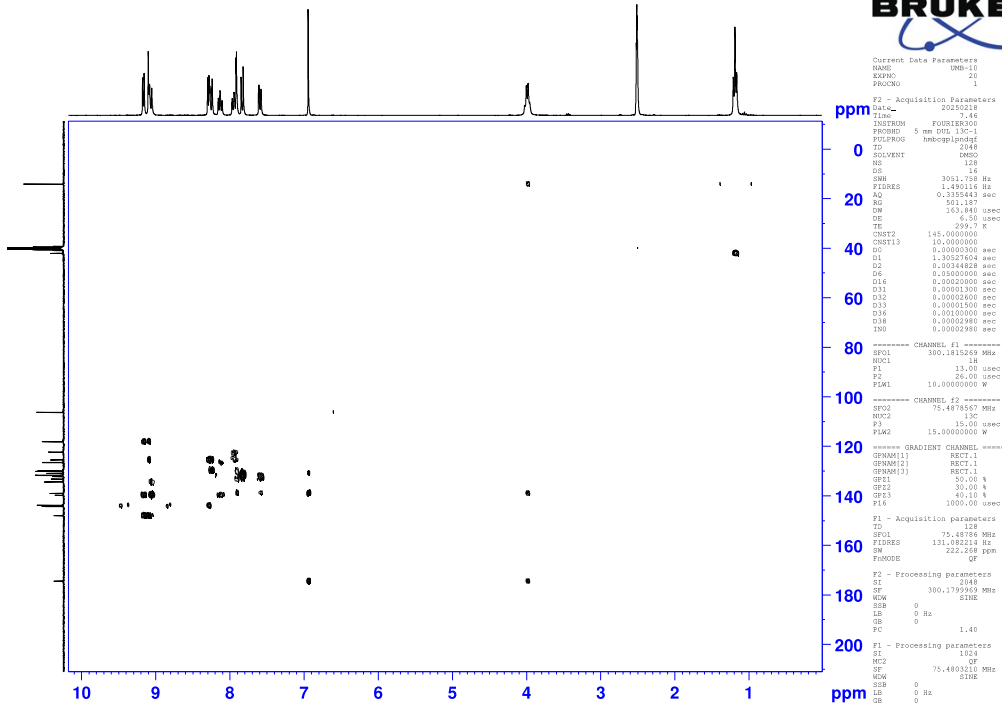

Spectra 30. HMBC spectra of compound 3i
